# Supplementary material for: Basin-scale multi-objective simulation-optimization modeling for conjunctive use of surface water and groundwater in northwest China
Source: Copernicus journal article supplement (doi:10.5194/hess-2019-278), 2019-07-02
Supplement: Supplementary file [file hess-2019-278-AC1-supplement.zip]

*Supplementary Materials for*

**Basin-scale multi-objective simulation-optimization modeling for  
conjunctive use of surface water and groundwater in northwest China**

Jian Song<sup>a</sup>, Yun Yang<sup>b</sup>, Xiaomin Sun<sup>c</sup>, Jin Lin<sup>c</sup>, Ming Wu<sup>d</sup>, Jianfeng Wu<sup>a,\*</sup>, Jichun Wu<sup>a</sup>

<sup>a</sup> Key Laboratory of Surficial Geochemistry, Ministry of Education; Department of  
Hydrosciences, School of Earth Sciences and Engineering, Nanjing University, Nanjing,  
210023, China

<sup>b</sup> School of Earth Sciences and Engineering, Hohai University, Nanjing, 210098, China

<sup>c</sup> Nanjing Hydraulic Research Institute, National Key Laboratory of Water Resources and  
Hydraulic Engineering, Nanjing, 210029, China

<sup>d</sup> Institute of Groundwater and Earth Sciences, Jinan University, Guangzhou, 510632, China

\*Correspondence to: Jianfeng Wu ([jfwu@nju.edu.cn](mailto:jfwu@nju.edu.cn); [jfwu.nju@gmail.com](mailto:jfwu.nju@gmail.com))

**Table S1** The control parameters and hypervolume metric obtained for  $\varepsilon$ -MOMA on  $M$ -objective DTLZ1 and DTLZ3 problems

| Problem | $M$ | $N_{dv}$ | $N_{pop}$ | $N_{eval}$ | $\varepsilon_{obj}$ | $rp$ | $HV_{rs}$ | $HV_{as}$ | $HV_n$ |
|---------|-----|----------|-----------|------------|---------------------|------|-----------|-----------|--------|
| DTLZ1   | 3   | $M+9$    | 200       | 100,000    | 0.01                | 0.55 | 0.14575   | 0.14480   | 0.9935 |
|         | 4   |          |           | 150,000    |                     |      | 0.08883   | 0.08828   | 0.9939 |
|         | 5   |          |           | 200,000    |                     |      | 0.05000   | 0.04982   | 0.9964 |
|         | 6   |          |           | 400,000    |                     |      | 0.02763   | 0.02759   | 0.9985 |
| DTLZ3   | 3   | $M+9$    | 200       | 100,000    | 0.01                | 1.05 | 0.63507   | 0.61857   | 0.9740 |
|         | 4   |          |           | 150,000    |                     |      | 0.89568   | 0.85577   | 0.9554 |
|         | 5   |          |           | 200,000    |                     |      | 1.08860   | 1.03550   | 0.9512 |
|         | 6   |          |           | 400,000    |                     |      | 1.23140   | 1.19210   | 0.9681 |

Note:  $M$  = number of objectives;  $N_{dv}$  = number of decision variables;  $N_{pop}$  = population size;  $N_{eval}$  = number of function evaluations;  $\varepsilon_{obj}$  = epsilon value for each objective;  $rp$  = the value of reference point for each objective;  $HV_{rs}$  = hypervolume of Pareto reference set;  $HV_{as}$  = hypervolume of Pareto approximate set;  $HV_n$  = the normalized hypervolume.

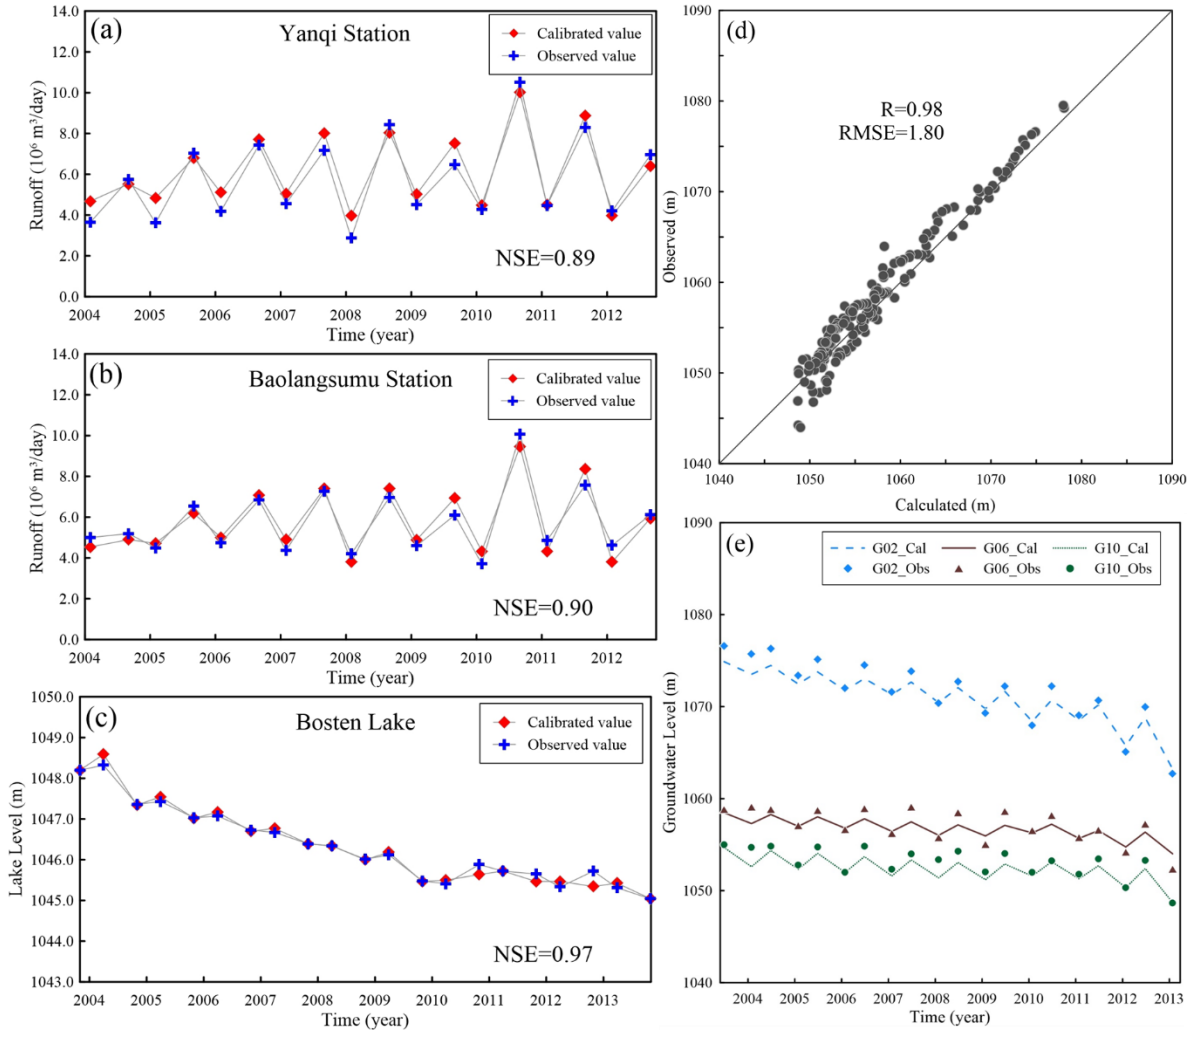

**Fig. S1** The calibrated results of the transient model showing (a) observed vs. calibrated runoff at Yanqi station over time, (b) observed vs. calibrated runoff at Baolangsumu station over time; (c) observed vs. calibrated lake level over time; (d) comparison of observed and calibrated groundwater heads at all observation wells, and (e) observed vs. calibrated groundwater heads over time at three typical observation locations as labeled in Fig. 3.
