# Supplementary material for: Basin-scale multi-objective simulation-optimization modeling for conjunctive use of surface water and groundwater in northwest China
Source: Copernicus journal article supplement (doi:10.5194/hess-2019-278), 2019-07-02
Supplement: Supplementary file [file hess-2019-278-AC2-supplement.pdf]

Response to the comments on the manuscript (**HESSD-2019-278**)  
**“Basin-scale multi-objective simulation-optimization modeling for conjunctive use of surface water and groundwater in northwest China”**  
by Jian Song, Yun Yang, Xiaomin Sun, Jin Lin, Ming Wu, Jianfeng Wu, and Jichun Wu

Note that the following text in **Arial Narrow font** denotes **Referee's comments** and in Times New Roman font denotes our response to the comments in the discussion. In our resubmission, the marked PDF file as follows has clearly indicated all changes to the original manuscript, tables and figures. Also, in the PDF file, marked in ~~a green strikethrough font~~ is the text that should be removed from the original manuscript and marked **in a red font** is the text that has been added to the revision. In addition, Line number(s) mentioned below can be referred to as that line numbering in the marked revised manuscript.

**Response to Referee Dr. Qiankun Luo's Comments**

This manuscript focus on the topic of conjunctive using of surface water and groundwater based on the multi-objective simulation and optimization method. In the manuscript, a novel multi-objective optimization model with four objective functions is developed to balance the water demand for agriculture, socioeconomic development and environmental demands. In order to find the Pareto optimal solutions for the special model, a new multi-objective evolutionary algorithm, named  $\epsilon$ -MOMA, is presented. The optimization results of Yanqi Basin (YB) in northwest China certified the applicability of the new model and optimization algorithm. Generally, the manuscript does make an important contribution on water resources management research. However, there are some general and specific comments referencing lines in the manuscript which will be helpful for the improvement of the manuscript.

**[Response]** We appreciate Dr. Qiankun Luo's insightful comments and constructive suggestions. We have fully addressed the concerns into the revised manuscript and given a point-by-point response as below.

General comments:

1. The introduction usually includes the research background, the research problems, a review of the advantages and disadvantages of the previous and latest research results, and the new solving method of the present research. Thus, the description of the detailed condition of the study area should be move into section 3.1.

**[Response]** Considering the referee’s concerns, we have reorganized the statements in the Introduction. Firstly, we clarified the necessity of water resources management in the arid inland basin to present the motivation of our study (**Lines 47-56**). Second, we explained the meaning of many-objective optimization framework in the water resources management and planning (**Lines 73-100**) and the optimization techniques (**Lines 101-126**). After that, we introduced the details of water resources exploitation in Yanqi Basin (YB) (**Lines 127-143**) to present the suitability of the case study. Then, we stated that it is necessary for YB water management to consider the deep uncertainty from climate change which probably results in the reduction of runoff in Kaidu River (**Lines 155-163**). Finally, we showed the general results of the study for the HESS readers (**Lines 164-174**).

2. The advantage of the newly developed optimization algorithm should be given in detail. For example, why the  $\varepsilon$ -MOMA is better than the other MOEA in solving groundwater management problems? What is the main difference between  $\varepsilon$ -box and the elite individual preservation strategy?

**[Response]** The point is well taken. We have split **Section 2.2** into **Section 2.2.1** “Main algorithmic structure” to present the process of the new algorithm step by step (**Lines 215-252**) and **Section 2.2.2** “Benchmark test” to investigate the performance of the algorithm (**Lines 259-277**). The new algorithm  $\varepsilon$ -MOMA which used several promising techniques from Borg MOEA and a local search operator to improve the optimality of Pareto solutions, has been validated to present the effectiveness in solving the many-objective optimization. In this study, it is not the focus to implement comparative study of the state-of-the-art MOEAs in solving water resources management problems. The benchmark test also show the potential of our algorithm (**Table S1 in Supplementary Materials**). After all, our study aims to propose a promising multi-objective optimization framework for the integrated surface water and groundwater management in the typical arid inland basin.

The concepts of Pareto dominance and  $\varepsilon$ -dominance can be defined as follows and we assume that all objectives are to be minimized. The vectors  $\mathbf{f}=(f_1, f_2, f_3, \dots, f_m)$  and  $\mathbf{g}=(g_1, g_2, g_3, \dots, g_m)$  can be denoted as objective values where  $m$  is the number of objectives and  $\boldsymbol{\varepsilon}=(\varepsilon_1, \varepsilon_2, \varepsilon_3, \dots, \varepsilon_m)$  is the allowable tolerance vector specified by the users.

The objective vector  $\mathbf{f}$  is said to Pareto dominate  $\mathbf{g}$ , if:

$$\begin{aligned} f_i &\leq g_i & \forall i \in \{1, \dots, m\} \\ f_i &< g_i & \exists i \in \{1, \dots, m\} \end{aligned} \tag{1}$$

The objective vector  $\mathbf{f}$  is said to  $\varepsilon$ -dominate  $\mathbf{g}$ , if:

$$(1 - \varepsilon_i) f_i \leq g_i \quad \forall i \in \{1, \dots, m\} \tag{2}$$

The  $\varepsilon$ -dominance allows the decision-makers to specify the resolution of the Pareto set

approximation by selecting an appropriate  $\varepsilon$  value while guarantees the diversity of Pareto solutions over the optimal Pareto front (Laumanns et al., 2002; Deb et al., 2005).

Laumanns, M., Thiele, L., Deb, K., and Zitzler, E. (2002). Combining convergence and diversity in evolutionary multi-objective optimization. *Evolutionary Computation*, 10(3): 263-282.

<https://doi.org/10.1162/106365602760234108>.

Deb, K., Mohan, M., and Mishra, S. (2005). Evaluating the  $\varepsilon$ -domination based multi-objective evolutionary algorithm for a quick computation of Pareto-optimal solutions. *Evolutionary Computation*, 13(4):

501-525. <https://doi.org/10.1162/106365605774666895>.

3. In the numerical simulation process, the irrigation backflow should be considered. How to deal with the irrigation backflow in the groundwater flow numerical simulation model of the YB?

**[Response]** The point is well taken. The irrigation water including surface water (SW) in an aqueduct system and groundwater (GW) in the regional aquifer. We allocate SW diverted from Kaidu River to an irrigation district according to the source of irrigation water derived from which aqueduct. The GW can be allocated in terms of the locations of pumping wells distributed in the irrigation district. The return flow from agriculture irrigation can be calculated by multiplying the irrigation water demands by the irrigation infiltration coefficient based on reports from the local water resources authority.

4. YB is a typical arid inland basin in China. The optimization results of YB are seemed reliably, can this optimization model be used directly in other basin or field?

**[Response]** The proposed many-objective optimization framework can be extended to solve the integrated SW-GW management problems (**Lines 681-683**) once the simulation model can be built in the other basins or fields. The simulation model can be developed with the fully-coupled hydrological model to reduce the prediction error derived from numerical model that is our focus in the future study.

Specific comments, where line numbers refer to the PDF version of the HESSD paper:

1. Line 168: I suggest to changing the “decision-maker” to “water manager” in the manuscript. The author sometimes uses “decision-maker” and sometimes uses “water manager”, which will confuse the readers.

**[Response]** Comment accepted and change made (**Lines 201-202**). We have modified the “decision-maker” to “water manager” in the context of elucidating water resource management throughout the manuscript.

2. Line 199-201: Did all of the referred recombination operators (SBX, DE, SPX, PCX, LX, UM) used in the new optimization method? Or only one of them was adopted? The author should clear it.

**[Response]** As stated in the manuscript (**Lines 223-232**), the crossover probability of each recombination operator is updated periodically based on the proportion of the solutions generated by the operator in the  $\varepsilon$ -dominance archive. In the optimization, we firstly assign same probability for all of the operators which can be used in the preliminary stage. The optimal operator can be chosen with the highest probability at the later stage of evolutionary search.

3. Line 291: There is a mistake in Equation 4, the “2” was lost.

**[Response]** Comment accepted and change made (**Line 359**).

4. Line 417: where the increment of  $f_{TPR}$  and  $f_{TDR}$  from, the explanation should be given.

**[Response]** The increments indicate the range of  $f_{TPR}$  and  $f_{TDR}$  across all the Pareto solutions to show the extent of regulation of groundwater abstraction and surface water diversion in the post-optimization (**Lines 488-489**).

5. Line 539-541: Why the lake level is changed to a smaller value? And why the maximum groundwater drawdown is reset to 10m?

**[Response]** The reduction of runoff in Kaidu River directly lowers the runoff inflow to the terminal lake which results in the decline of lake level. Meanwhile, the groundwater exploitation must be augmented to offset the reduction of available runoff for irrigation water demands, which increases the groundwater drawdown in the regional aquifer. In the optimization, the constraints of minimum lake level and maximum groundwater drawdown need to be altered to avoid much more infeasible solutions in the population which inhibits convergence of the MOEA. The optimization under Scenarios A0, A1 and A2 is to implement comparative analysis for quantifying the effect of runoff reduction on the YB water management.

6. Line 557: “a certain value” should be given explicitly for the case study.

**[Response]** The point is well taken. We have modified the statement in the revised manuscript (**Lines 624-626**).

7. Line 578: Change “Yanqi Basin” to “YB”.

**[Response]** Comment accepted and change made (**Line 647**).

1 **Basin-scale multi-objective simulation-optimization modeling for**  
2 **conjunctive use of surface water and groundwater in northwest China**

3 Jian Song<sup>a</sup>, Yun Yang<sup>b</sup>, Xiaomin Sun<sup>c</sup>, Jin Lin<sup>c</sup>, Ming Wu<sup>d</sup>, Jianfeng Wu<sup>a,\*</sup>, Jichun Wu<sup>a</sup>

4  
5 <sup>a</sup> Key Laboratory of Surficial Geochemistry, Ministry of Education; Department of  
6 Hydrosciences, School of Earth Sciences and Engineering, Nanjing University, Nanjing,  
7 210023, China

8 <sup>b</sup> School of Earth Sciences and Engineering, Hohai University, Nanjing, 210098, China

9 <sup>c</sup> Nanjing Hydraulic Research Institute, National Key Laboratory of Water Resources and  
10 Hydraulic Engineering, Nanjing, 210029, China

11 <sup>d</sup> Institute of Groundwater and Earth Sciences, Jinan University, Guangzhou, 510632, China

12

13

14

15

16 \*Corresponding author: Jianfeng Wu ([jfwu@nju.edu.cn](mailto:jfwu@nju.edu.cn); [jfwu.nju@gmail.com](mailto:jfwu.nju@gmail.com))

17

18

19 **ABSTRACT**

20 In the arid inland basins of China, the long-term unregulated agricultural irrigation from  
21 surface water diversion and groundwater abstraction has caused unsustainability of water  
22 resources and degradation of ecosystems. This requires integrated management of surface  
23 water (SW) and groundwater (GW) at basin scale to achieve scientific decision supports for  
24 sustainable water resources allocation in China. This study developed a novel multi-objective  
25 simulation-optimization (S-O) modeling framework. The optimization framework integrated a  
26 new epsilon multi-objective memetic algorithm ( $\epsilon$ -MOMA) with MODFLOW-NWT model to  
27 implement the real-world decision-making for water resources management while pondering  
28 the complicated groundwater-lake-river interaction in the arid inland basin. Then the  
29 optimization technique was validated through the SW-GW management in Yanqi Basin (YB), a  
30 typical arid region with intensive agricultural irrigation in northwest China. The management  
31 model, involving maximizations of total water supply rate, groundwater storage and surface  
32 runoff inflow to the terminal lake, and minimization of water delivery cost, was proposed to  
33 explore the tradeoffs between socioeconomic and environmental factors. It is shown that the  
34 tradeoff surface can be achieved in the 4-dimensional objective space by optimizing spatial  
35 groundwater abstraction in the irrigation districts and surface water diversion in the river. The  
36 Pareto-optimal solutions avoid the prevalence of decision bias caused by the low-dimensional  
37 problem formulation. Water managers are then able to identify their desired water management  
38 schemes with preferred objectives and achieve maximal socioeconomic and ecological benefits  
39 simultaneously. Moreover, three representative runoff scenarios related to the climate change  
40 were specified to quantify the influence of decreasing runoff in the river on the YB water  
41 management. Results show that runoff depletion would be of great negative impact on the  
42 management objectives. Therefore, the integrated SW and GW management is of critical  
43 importance for the fragile ecosystem under changing climatic conditions.

44 **Keywords:** Multi-objective optimization; Water resources management; Conjunctive use;  
45 Yanqi Basin; Bosten Lake

## 46 **1. Introduction**

47 In arid and semi-arid inland basins, the intensive irrigation for agricultural development  
48 caused the deterioration of natural ecosystem sustained with scarce water resources (Wichelns  
49 and Oster, 2006; Wu et al., 2016). In such cases, water managers are faced with choosing the  
50 optimal water supply scheme for the local economic development and eco-environmental  
51 conservation. In general, the pattern of water allocation in such regions incorporates  
52 groundwater (GW) abstraction from aquifer systems and surface water (SW) diversion from  
53 surface rivers (Liu et al., 2010; Wu et al., 2014). Hence, the conjunctive management of GW  
54 and SW is essential for dealing with the contradiction between demand and supply of water  
55 resources in the arid regions with water shortage (Khare et al., 2006; Safavi and Esmikhani,  
56 2013; Singh, 2014; Hassanzadeh, et al., 2014; Wu et al., 2016). ~~Yanqi Basin (YB) is a typical  
57 oasis in an arid inland basin located to the southern Tianshan Mountains in Xinjiang Province,  
58 northwest China. The surface water resource in YB is mainly composed of a river and a lake,  
59 namely Kaidu River and Bosten Lake, the biggest freshwater inland lake in China (Wang et al.,  
60 2014; Zhou et al., 2015). Kaidu River supplies approximately 95% of total inflow to Bosten  
61 Lake (Gao and Yao, 2005; Liu et al., 2013; Yao et al., 2018) which is the major water source of  
62 the Kongqi River recharged by an artificial pumping station built in 1983. Therefore, the water  
63 supply scheme in YB dominates the water balance in Bosten Lake and has a significant  
64 influence on the Kongqi River and the lower reaches of Tarim River where the serious water  
65 crisis has taken place. With the intensive agricultural development, surface water diverted from  
66 Kaidu River can no longer meet crop water requirements. Thus, groundwater became the  
67 alternative water source for crop production whereas the excessive groundwater exploitation  
68 has caused the deterioration of local ecosystem associated with the decline of groundwater~~

69 ~~level and altered the hydraulic interaction between GW and SW (Hu et al., 2007; Zhang et al.,~~  
70 ~~2014; Tian, et al., 2015, Yao et al., 2015). For this reason, the integrated SW and GW~~  
71 ~~management is essential for rational utilization of water resources in the arid inland basin due~~  
72 ~~to the physical water scarcity.~~

73 In the water resources planning and management, the simulation-optimization (S-O)  
74 approaches can provide optimal schemes to guide and inform stakeholders (Maier et al., 2014).  
75 In the S-O framework, the simulation model explains the physical behaviors of water resources  
76 system and the management model explains the evaluation criteria of the water supply options  
77 (Singh, 2014). The management model includes objective functions as the performance metric  
78 of candidate schemes and constraint conditions defining the feasible decision space. However,  
79 the real-world water management problems are often complex, and associated with nonlinear  
80 and multimodal objectives and constraints. This complexity probably leads to the unavailability  
81 of the classical optimization algorithms such as mathematical programming and dynamic  
82 programming (Woodruff et al., 2013). For this reason, evolutionary algorithms have been  
83 extensively proved to be effective and reliable in solving the limitations of complex water  
84 resources management (McPhee and Yeh, 2004; Yang, et al., 2009; Safavi and Esmikhani,  
85 2013; Singh and Panda, 2013; Rothman and Mays, 2013; Wu et al., 2014;  
86 Parsapour-Moghaddam et al., 2015; Wu et al., 2016). Yang et al. (2009) considered conflicting  
87 bi-objectives with the conjunctive use of GW and SW to achieve optimal pumping and  
88 recharge schemes. Rothman and Mays (2013) developed an optimization model including cost  
89 control, aquifer protection and growth objectives using multi-objective genetic algorithm. Wu  
90 et al. (2016) performed the temporal optimization of monthly volume of surface water diverted  
91 from Heihe River by linking a physical-based integrated modeling with a simple  
92 single-objective management model. However, these studies rarely consider multi-objective  
93 optimization in the basin-scale water management with conjunctive use of SW and GW. The



94 management model including the typical single objective or bi-objective formulation probably  
95 results in the decision bias (*i.e.*, cognitive myopia or short-sightedness) due to the sub-optimal  
96 solution only considering the fewer preference criteria (Kasprzyk et al., 2012, 2015; Woodruff  
97 et al., 2013; Matteo et al., 2019). Therefore, the water resources management with the strong  
98 and complex interactions between SW and GW calls for water manager to consider  
99 many-objective optimization that refers to the system design with four or more objectives  
100 (Fleming et al., 2005).

101 Multi-objective evolutionary algorithms (MOEAs) can obtain the tradeoff solutions that  
102 cater to multiple competing objectives and reflect comprehensive decision information for  
103 practitioners in real-world applications (Reed et al., 2013; Beh et al., 2017; Eker and Kwakkel,  
104 2018; Maier et al., 2019). However, many-objective optimization often suffers from the  
105 domination resistance phenomenon (Purshouse and Fleming, 2007; Hadka and Reed, 2013),  
106 which shows that the diminishing Pareto-sorting capacity triggers many non-dominated  
107 solutions in the population and then results in stagnation of evolutionary search. In order to  
108 alleviate the difficulty, Borg MOEA (Hadka and Reed, 2013) employed auto-adaptive  
109 recombination operators to enhance the ability of evolutionary search,  $\epsilon$ -box technique to  
110 ensure the diversity and adaptive population sizing scheme to avoid search stagnation. The  
111 hybrid MOEA framework, namely multi-objective memetic algorithm, composed of the  
112 biological process of natural selection and cultural evolution capable of local refinement, was  
113 applied to overcome some shortcomings of the traditional MOEA (*e.g.*, slow convergence,  
114 inefficient termination criterion, etc.) (Sindhya et al., 2011; 2013). These state-of-the-art  
115 MOEAs have been extensively validated and evaluated in addressing multi-objective  
116 optimization problems. However, due to the diversity and complexity of real-word  
117 decision-making problems, the algorithms may be inefficient in maintaining the diversity and  
118 convergence of Pareto front. For example, Zheng et al. (2016) implemented the comparison of

119 NSGAI, SAMODE and Borg in designing water distribution systems. The result indicated that  
120 Borg can converge quickly to the Pareto-optimal front whereas decrease the diversity of  
121 solutions. Hence, further efforts should be focused on advancing the MOEAs. This study aims  
122 at developing a new MOEA, named epsilon multi-objective memetic algorithm ( $\epsilon$ -MOMA),  
123 which integrates the  $\epsilon$ -dominance concept, the auto-adaptive recombination operator and a  
124 local search operator into the basic framework of NSGAI (Deb et al., 2002). Then, the  
125 proposed multi-objective optimization framework is applied to solve the integrated  
126 management of SW and GW in Yanqi Bain (YB).

127 YB is a typical oasis in an arid inland basin located to the southern Tianshan Mountains in  
128 Xinjiang Province, northwest China. The surface water resource in YB is composed of Kaidu  
129 River and Bosten Lake, the largest freshwater inland lake in China (Wang et al., 2014; Zhou et  
130 al., 2015). Kaidu River, as the largest river in the basin, supplies the vast majority of surface  
131 water for agricultural irrigation and recharge for Bosten Lake (Gao and Yao, 2005; Liu et al.,  
132 2013; Yao et al., 2018). Therefore, surface water diversion in the river dominates the water  
133 balance in Bosten Lake, which is the main water source for the lower reaches of Tarim River  
134 where the serious water crisis has taken place. With the intensive agricultural development in  
135 the past decades, surface water diverted from Kaidu River can no longer meet crop water  
136 requirements. Hence, groundwater became the alternative water source for crop production  
137 whereas the excessive groundwater abstraction has caused the deterioration of local ecosystem  
138 associated with the decline of groundwater level and altered the hydraulic interaction between  
139 GW and SW (Hu et al., 2007; Zhang et al., 2014; Tian, et al., 2015, Yao et al., 2015). Current  
140 water resources regulations in YB have shown the low performance in maintaining regional  
141 water balance, e.g., decline of lake level in Bosten Lake. Therefore, the spatial pattern of water  
142 utilization (i.e., decision variables) should be regulated to satisfy the preferred management  
143 objectives. The pattern is composed of groundwater abstraction in irrigation districts and

144 surface water diversion through the aqueduct system connected with the river. The  
145 management objectives comprise minimizing the capital and operation costs of water delivery,  
146 maximizing water use demands for agricultural development (*i.e.*, total volume of surface  
147 water and groundwater use) and the environmental flow for conservation of the ecosystem (*i.e.*,  
148 the regional groundwater storage and surface runoff inflow to the terminal lake). This study  
149 implements the integrated management of SW and GW by investigating the performance of  
150 tradeoffs including environmental, economic, social factors in designing optimal water  
151 allocation schemes by the new optimization framework. To our knowledge, there are very few  
152 researches about the many-objective optimization for the conjunctive management of SW-GW  
153 involving complex groundwater-river-lake interactions in arid inland basins within S-O  
154 framework.

155 In the changing world, the optimized schemes probably exhibit low performance even  
156 unfeasible under the future conditions (Maier et al., 2016). In YB, Kaidu River mainly gains  
157 water from seasonal precipitation that runs off the mountainous landscape and snow and  
158 glacier that melts in the upper Tianshan Mountains region known as a main water tower in the  
159 Central Asia. Therefore, the runoff variation in Kaidu River, which is highly sensitive to the  
160 changes of precipitation and glacier mass loss dominated by the climate change, greatly affects  
161 the water resources and water cycle in the basin. Three representative runoff scenarios related  
162 to climate change are specified to explore the effects of runoff reduction in Kaidu River on the  
163 integrated SW and GW management practices.

164 This study firstly constructed the multi-objective SW-GW management model to consider  
165 water demands and environmental benefits including regional groundwater storage and surface  
166 runoff inflow to the terminal lake. Then the spatial conjunctive optimization of surface water  
167 diversion and groundwater abstraction was implemented based on the proposed optimization  
168 framework. The optimization results demonstrate that water managers can achieve the

169 Pareto-optimal schemes constrained by satisfying the water demands and sustaining the fragile  
170 ecosystem in the arid inland basin with strong and complex SW-GW interactions. The  
171 implication from the runoff reduction scenarios based optimization shows that the conservative  
172 water management options may be desired in the face of the deep uncertainty from the climate  
173 changes. The study results can also provide valuable insights for water allocation in other arid  
174 inland basins.

## 175 **2. Methodology**

176 As shown in Fig. 1, this study aims to develop a multi-objective decision-making  
177 framework to optimize irrigation schemes of surface water diversion and groundwater  
178 abstraction for the integrated SW and GW management. The optimal schemes can assist water  
179 managers~~decision-makers~~ to achieve water demands and ensure water balance of ecosystem in  
180 the arid inland basin. The optimization framework includes three main modules and their  
181 details are stated in the following sections.

### 182 **Figure 1.**

#### 183 *2.1 Problem formulation*

184 Module I in the optimization framework is to formulate an integrated SW and GW  
185 management model to implement water resources management in the basin. The water  
186 utilization patterns for irrigation are composed of diverting surface water from the inland reach  
187 of river basin and pumping groundwater from the regional aquifer. Therefore, the decision  
188 variables comprise the volume of surface water diversion in the aqueduct system and  
189 groundwater abstraction in the irrigation districts. In general, the optimal water supply  
190 strategies are maximizing the total volume of water supply and minimizing the capital and  
191 operation costs of water delivery. However, in the arid inland basin with water scarcity, the  
192 intensive agricultural development requires enough irrigation water to ensure local economic

193 development while the sustainability of ecosystem also needs to follow specific requirements  
194 for maintaining environmental flows. For example, the excessive surface water diversion can  
195 significantly reduce the runoff inflow to the terminal lake, which causes obvious decline of  
196 lake level and results in the degradation of local ecosystem associated with the lake.  
197 Meanwhile, immoderate exploitation of groundwater stored in the aquifer to offset the surface  
198 water shortage triggers a series of environment problems (*e.g.*, dramatic decrease of  
199 groundwater storage). Therefore, the conflict between agricultural development and  
200 environmental conservation constrained by water scarcity stimulates the local water resources  
201 authority to implement scientific water management practices. The water  
202 managers ~~decision-makers~~ should consider the total water supply rate and the cost of water  
203 delivery from multiple sources as socioeconomic metrics, and describe the runoff inflow to the  
204 lake and groundwater storage as environmental metrics. Then, water managers can assess water  
205 use practices by weighing these preference criteria. The performances of all schemes are  
206 evaluated based on the well-calibrated numerical model. The detailed formulation of  
207 management model can be seen in Section 3.3. Finally, the optimization model formulates  
208 water use practices as decision variables, socioeconomic and environmental metrics as  
209 management objectives, practical limitation of water exploitation and water demands for  
210 ecosystem as constrained conditions for the basin-scale SW and GW management.

## 211 2.2 Optimization approach

### 212 2.2.1 Main algorithmic structure

213 Module II in the optimization framework illustrates the algorithmic process of  $\varepsilon$ -MOMA.

214 The main steps can be recapitulated as follows:

215 **Step 1:** Generation of initial population:  $N_{pop}$  individuals are firstly sampled over the decision  
216 space using Latin Hypercube Sampling (LHS) that is an effective sample scheme to ensure the

217 uniform distribution of initial population.

218 **Step 2:** Evaluation process of objectives and constraints: The original simulation model is run  
219 with the calibrated parameters. Then objectives and constraints are calculated from the model  
220 output variables (*i.e.*, state variables).

221 **Step 3:** Evolutionary operators for the creation of offspring population: The auto-adaptive  
222 multi-operator recombination proposed by Hadka and Reed (2013) is a promising technique to  
223 select optimal operator for real-world optimization problems. The crossover probability of each  
224 operator is updated periodically based on the proportion of the solutions generated by each  
225 operator in the  $\epsilon$ -dominance archive. The recombination strategy is essential for the intricate  
226 multi-objective optimization in the real-world problems due to the inability to know a priori the  
227 optimal recombination operator. This study integrated the six real-valued recombination  
228 operators (*i.e.*, simulated binary crossover (SBX) (Deb and Agrawal, 1994), differential  
229 evolution (DE) (Storn and Price, 1997), simplex crossover (SPX) (Tsutsui et al., 1999),  
230 parent-centric crossover (PCX) (Deb et al., 2002), Laplace crossover (LX) (Deep and Thakur,  
231 2007), uniform mutation (UM)) into the  $\epsilon$ -MOMA to enhance the potential of evolutionary  
232 search in higher order objective spaces. Additionally, the polynomial mutation is applied to the  
233 recombination population.

234 **Step 4:** The  $\epsilon$ -dominance archive process: The  $\epsilon$ -box technique proposed by Laumanns et al.  
235 (2002) attempts to ensure convergence and diversity of the approximate Pareto solutions.  
236 Moreover, decision-makers can define the minimum resolution of objective vector with epsilon  
237 vector to satisfy their acceptable precision target and restrict the archive size. This study  
238 implemented the  $\epsilon$ -dominance archive process after the fast non-dominated sorting of offspring  
239 individuals and alleviated the difficulties derived from the domination resistance in the  
240 many-objective optimization.

241 **Step 5:** Bidirectional local mutation: The archived solutions are operated based on Gaussian

242 perturbation in the neighborhood of decision variables. Given an archived individual  
243  $\mathbf{v}=(v_1,v_2,v_3,\dots,v_n)$ , the mutated individuals can be stated as:

$$244 \quad \mathbf{v}^+=(v_1,v_2,\dots,v_i+p\times(m_i-w_i),\dots,v_n) \quad (1)$$

$$245 \quad \mathbf{v}^-=(v_1,v_2,\dots,v_i-p\times(m_i-w_i),\dots,v_n) \quad (2)$$

246 where  $\mathbf{v}=(v_1,v_2,\dots,v_n)$  is an  $n$ -dimensional decision variable vector;  $\mathbf{m}=(m_1,m_2,\dots,m_n)$  and  
247  $\mathbf{w}=(w_1,w_2,\dots,w_n)$  are two individuals randomly selected from the archive;  $c$  follows standard  
248 Gaussian distribution. The process is effective with the probability of  $1/n$  (Chen et al., 2015).  
249 The algorithm revives the local search operator in every several generations and then updates  
250 the archive again.

251 **Step 6:** Return to Step 2 if the termination criterion is not satisfied. This study specified the  
252 number of function evaluations as termination condition.

253 The basic framework of  $\varepsilon$ -MOMA is similar to the traditional NSGA-II with significant  
254 change in recombination operators and  $\varepsilon$ -dominance archive with a local search operator. The  
255 algorithm possesses the ability of highly effective global search with adaptive recombination  
256 operator and epsilon domination to find higher quality and diverse solutions with local search  
257 operator.

### 258 2.2.2 Benchmark test

259 To investigate the performance of  $\varepsilon$ -MOMA in the many-objective optimization, we  
260 implement benchmark test with the 3 to 6 objectives DTLZ1 and DTLZ3 problems (Deb et al.,  
261 2002). The test instances are deceptive and probably converge to the sub-optimal Pareto front,  
262 which provides a severe challenge for the algorithm to get close to the global Pareto-optimal  
263 front. The hypervolume metric (HV) is applied to evaluate the convergence and diversity of  
264 approximate Pareto front (Zitzler et al., 2003). The global Pareto-optimal front for DTLZ  
265 problems is known and can be considered as the reference set. The HV metric indicates the

266 dominated region of the non-dominated solutions relative to the reference point that is the  
267 extent of the reference set. The HV of the reference set ( $HV_{rs}$ ) and the approximate set ( $HV_{as}$ )  
268 can be calculated using a fast search algorithm proposed by Bader and Zitzler (2011) in the  
269 high-dimensional objective space. This study uses the normalized HV (*i.e.*,  $HV_n = HV_{as}/HV_{rs}$ )  
270 to evaluate the performance of  $\varepsilon$ -MOMA for the test problems. The approximate Pareto front  
271 completely converges to the reference set when  $HV_n$  is equal to one. The test results show that  
272  $\varepsilon$ -MOMA is capable of achieving a larger value of  $HV_n$  metric (over 95%), indicating that the  
273 approximate Pareto front is very close to global optimal Pareto front (Table S1 in the  
274 Supplementary Materials). In higher-dimensional objective space, the performance of  
275  $\varepsilon$ -MOMA can be maintained by increasing the number of function evaluations. Therefore, the  
276 proposed  $\varepsilon$ -MOMA is effective in addressing many-objective optimization based on the  
277 benchmark test.

### 278 *2.3 Visual analytics of Pareto-front*

279 In the many-objective optimization, it is difficult for water managers to distinguish the  
280 performance of single solution and discover desired schemes without the interactive visual  
281 analytics. Module III used a visual analytics package, DiscoveryDV (Hadka et al., 2015; Kollat  
282 and Reed, 2007), to explore and analyze water management practices in the high-order  
283 objective spaces. The package employed multi-dimensional coordinate plot and parallel  
284 coordinate plot (Inselberg, 2009) to visualize Pareto solutions. Visualizing performance  
285 objectives can assist stakeholders to compare with the scheme before the optimization and  
286 select key tradeoff schemes with a clearer perspective (Matteo et al., 2019; Maier et al., 2014).  
287 Moreover, decision-makers can eliminate redundant schemes based on the preferred objectives  
288 or concerns and filter the optimal subsets those probably adopted by the experienced  
289 practitioners.



## 290 3 Case study

### 291 3.1 Study area

292 YB is a typical oasis in an arid inland desert basin in the southern Tianshan Mountains,  
293 Xinjiang Province, northwest China and includes Yanqi County, Hejing County, Bohu County  
294 and Heshuo County, with a total area of about 7600 km<sup>2</sup> (Fig. 2). In the model domain, the  
295 northwest is mountainous and the south is a low-lying desert, and the terrain slopes from  
296 northwest to lower southeast. YB is located in the temperate zone of continental desert climate  
297 with an annual mean temperature of 14.6 °C, an annual precipitation of 50.7-79.9 mm, and a  
298 potential evaporation of 2000.5-2449.7 mm (Mamat et al., 2014). The basin is mainly  
299 composed of the Kaidu River, Huangshuigou River and Qingshui River. Kaidu River originates  
300 from the Hargat Valley and the Jacsta Valley in the middle part of the Tianshan Mountain with  
301 a maximum altitude of 5000 m and ends in Bosten Lake (Xu et al., 2016). Kaidu River is the  
302 largest river in YB which provides annual mean runoff of 3.41 billion m<sup>3</sup> (Wang et al., 2013)  
303 and plays an utmost role in protecting the lake and its surrounding ecology and environment.  
304 The Dashankou station is the dividing point that divides the mainstream of the river into  
305 middle and lower reaches. In YB, the runoff in Kaidu River is mainly diverted for agricultural  
306 irrigation and finally flows into Bosten Lake, which contributes to about 95% of the water  
307 recharge for the lake (Yao et al., 2018). Bosten Lake is a largest freshwater inland lake in China  
308 covering the area of about 1005 km<sup>2</sup> with a length of 55 km and a width of 25 km. The lake  
309 water volume is approximately 8.80 billion m<sup>3</sup>, with an average depth of 7 m and a maximum  
310 depth of 17 m (Xiao et al., 2010). The evaporation and an artificial discharge by a pumping  
311 station built in 1983 control the outflow of the lake. As shown in Fig. 2, the pumping channel  
312 starting from the outflow point is used to divert the lake water to recharge Kongqi River and  
313 supply water to the lower Tarim River. The dam is built to sustain higher lake level for the

314 water diversion. Therefore, Bosten Lake is a main water source to the lower reaches of Tarim  
315 River, which has suffered from severe degradation of ecological environment resulted from  
316 unregulated water exploitation in the past decades. In order to regenerate “Green Corridor” in  
317 the lower reaches of Tarim River, Chinese government has implemented the Ecological Water  
318 Conveyance Project since 2000 to increase the recharge of groundwater system that is crucial  
319 for the growth of natural vegetation (Xu et al., 2007; Hao and Li, 2014). The project firstly  
320 transfers water from Bosten Lake to Daxihaizi Reservoir and then to the lower reaches of  
321 Qiwenkur River, a large tributary of Tarim River, and finally to Taitema Lake (Chen et al.,  
322 2010). However, YB is an intensive agricultural area where is mostly made up of farmland  
323 growing crops of tomato and pepper. The irrigation water demands accounted for 90% of the  
324 total water consumption in the basin due to the rapid increase of farmland area in the recent  
325 years (Yao, et al., 2018). Consequently, scientific water management strategies should strike  
326 for balancing the demands of existing irrigation and eco-environmental water use to sustain  
327 enough water inflowing from Kaidu River to the lake and the aquifer.

328 This study selects the core part of YB comprising the majority of irrigation districts and  
329 Kaidu River. The river plays a vital role in regulating and maintaining regional water balance  
330 in the basin. The model domain (Fig. 2) is bounded by the mountains on the northwest,  
331 Huangshuigou River on the northeast, swamp areas and Bosten Lake on the south. As shown in  
332 Fig. 2, an aqueduct system conveys and redistributes the surface runoff from the mainstream of  
333 Kaidu River and the wells are used to pump groundwater from the aquifer.

334 **Figure 2.**

### 335 *3.2 Numerical model*

336 The numerical model in this study is modified from the previous work of Wu et al. (2018)  
337 using MODFLOW-NWT (Niswonger, 2011). Then we perform a multi-objective optimization

338 with the corrected model. The specified boundary conditions in the model are illustrated in Fig.  
 339 3. The northwest border was defined as the flow boundary to simulate recharge of groundwater  
 340 runoff in the interface between mountains and plain. Huangshuigou River and southwest  
 341 border were considered as the specified head boundary based on observed groundwater level.  
 342 The swamps and Bosten Lake were modelled using the General Head Boundary (GHB)  
 343 package and Lake package (LAK3) (Michael and Leonard, 2000), respectively. The  
 344 bathymetric contours of Bosten Lake were used to confirm the lake bottom topography. Kaidu  
 345 River and aqueducts were simulated using the Streamflow-Routing package (SFR2) (Richard  
 346 and David, 2010). The simulation period in the transient model was defined from November in  
 347 2003 to October in 2013. Totally 20 stress periods were discretized, two periods for each year  
 348 including non-irrigation period (from November to next March) and irrigation period (from  
 349 April to October of each year), over the entire simulation period. The key parameters for both  
 350 SW and GW were adjusted to reproduce the fluctuation of groundwater levels at the  
 351 observation wells and streamflow in the gaging stations (*i.e.*, Yanqi and Baolangsumu stations).  
 352 The observed lake levels in the simulation period were employed to calibrate the model.

353 **Figure 3.**

354 The model calibration was manually implemented by the trial-and-error method. The  
 355 Nash-Sutcliffe Efficiency (NSE) was applied to evaluate the simulated precision of runoff and  
 356 lake level. The predicted accuracy of groundwater head was assessed based on root mean  
 357 square error (RMSE) and correlation coefficient ( $R$ ). The performance criteria can be stated as:

$$358 \quad \text{NSE} = 1 - \frac{\sum_{t=1}^T (y_{m,t} - y_{o,t})^2}{\sum_{t=1}^T (y_{o,t} - \bar{y}_o)^2} \quad (3)$$

$$359 \quad \text{RMSE} = \sqrt{\sum_{i=1}^N (y_{m,i} - y_{o,i})^2 / N} \quad (4)$$

$$R = \frac{\sum_{i=1}^N (y_{m,i} - \bar{y}_m)(y_{o,i} - \bar{y}_o)}{\sqrt{\sum_{i=1}^N (y_{m,i} - \bar{y}_m)^2 \times \sum_{i=1}^N (y_{o,i} - \bar{y}_o)^2}} \quad (5)$$

361 where  $y_{m,t}$  and  $y_{o,t}$  are the simulated and observed runoff or lake level for  $t$ th stress period,  
 362 respectively;  $T$  is the number of stress periods;  $y_{m,i}$  and  $y_{o,i}$  are the simulated and observed  
 363 groundwater head at the  $i$ th observation well, respectively;  $N$  is the number of observation  
 364 wells;  $\bar{y}_m$  and  $\bar{y}_o$  are the average value of simulated and observed data. In the  
 365 Supplementary Materials, Fig. S1a and S1b compare the simulated and observed runoff at  
 366 Yanqi and Baolangsumu Stations for the periods between 2004 and 2012 and suggest that the  
 367 long-term fluctuation of runoff in Kaidu River can be well reproduced with NSE of 0.89 and  
 368 0.9, respectively. Fig. S1d shows the simulated groundwater heads have a good-fit with  
 369 observed heads at the all observation wells with RMSE of 1.8 m and R of 0.98. Fig. S1e  
 370 compares the observed and calibrated groundwater level over time in the three observation  
 371 wells and the groundwater variation trend in the irrigation and non-irrigation period can be  
 372 achieved.

373 The interaction between Bosten Lake and the aquifer is dominated by the hydraulic  
 374 conductivity of the lakebed, of which value is very small owing to the existence of the thick  
 375 low-permeability sediment in the region. The main inflow term of the lake is the surface runoff  
 376 from Kaidu River which has been calibrated with the runoff data in the gauging stations. The  
 377 recharge for the lake from precipitation is not significant in the arid inland basin. The outflow  
 378 terms are mainly composed of the evaporation and artificial pumping to divert water from the  
 379 lake to Kongqi River. The local water resources authority in YB provided the data of artificial  
 380 pumping in the simulation period. However, the average evaporation in Bosten Lake calculated  
 381 using potential evaporation data or Penman's equation is not accurate because the temperature  
 382 and relative humidity exhibit the significant difference over the approximately 945.0 km<sup>2</sup>

383 evaporation surface. Therefore, the observed lake stages were applied to calibrate evaporation  
384 rate in the lake. Fig. S1c illustrates the calibration results of lake level (NSE=0.97) and  
385 indicates that the decline trend of lake level can be adequately captured. Then, the water  
386 balance of Bosten Lake can be achieved as shown in Fig. 4. In the simulation period from 2004  
387 to 2013, surface runoff inflow in Kaidu River represents 97.4% of the total annual inflow to the  
388 Bosten Lake. The total annual outflow of the lake consists of 54.9% of lake evaporation and  
389 44.2% of artificial pumping. Therefore, the surface runoff in Kaidu River is a crucial factor to  
390 maintain the water balance of Bosten Lake. The surface runoff inflow can be considered as a  
391 significant performance metric to evaluate the water use practices in the basin. Finally, the  
392 well-calibrated model can be employed to integrated SW and GW management.

393 **Figure 4.**

### 394 *3.3 Management model*

395 The integrated SW and GW management focuses on not only the water resources  
396 exploitation subject to social and economic benefits but also the effect of water exploitation on  
397 environment benefits. The study formulated an integrated SW and GW optimization problem  
398 including four management objectives: (1) to maximize total water supply rate ( $f_{TWS}$ ); (2) to  
399 minimize total cost of water delivery from water intake points to water use destinations ( $f_{TCOST}$ );  
400 (3) to maximize the groundwater storage change of saturated zone between the beginning and  
401 end of management period ( $f_{GSC}$ ) which is negative when the storage decreases and vice versa;  
402 and (4) to maximize surface runoff inflow from Kaidu River to Bosten Lake ( $f_{SRI}$ ).  $f_{TWS}$  and  
403  $f_{TCOST}$  are defined as the metrics to satisfy the local irrigation water demands while maintain the  
404 lower costs of water use.  $f_{GSC}$  is formulated as the metric indicating the extent of groundwater  
405 abstraction and a greater value shows a preferred situation.  $f_{SRI}$  is defined to evaluate the  
406 influence of surface runoff from Kaidu River on the water balance in Bosten Lake, which

407 contributes about 97.4% of the total inflow (Fig. 4). As shown in Fig. 5, the decision variables  
 408 are the total volume of surface water diverted in the mainstream of Kaidu River in the  
 409 diversion point (DP1-DP7) and groundwater abstraction in the irrigation districts (ID1-ID11).  
 410 The formulations of management model are given as follows:

$$411 \quad \text{Max} \quad f_{TWS} = \sum_{i=1}^{N_p} Q_{g,i} + \sum_{i=1}^{N_d} Q_{s,i} \quad (6)$$

$$412 \quad \text{Min} \quad f_{TCOST} = \sum_{k=1}^{N_t} \sum_{i=1}^{N_w} q_{g,i,k} C_g (H_i - h_{i,k}) T_k + \sum_{k=1}^{N_t} \sum_{i=1}^{N_d} q_{s,i,k} C_s T_k \quad (7)$$

$$413 \quad \text{Max} \quad f_{GSC} = \sum_{j=1}^{N_g} (h_{end,j} - h_{ini,j}) S y_j A_j \quad (8)$$

$$414 \quad \text{Max} \quad f_{SRI} = f_{gaging}(\mathbf{X}) \quad (9)$$

$$415 \quad \mathbf{X} = (Q_{g,1}, Q_{g,2}, \dots, Q_{g,N_p}; Q_{s,1}, Q_{s,2}, \dots, Q_{s,N_d}) \quad (10)$$

416 where  $Q_{g,i}$  is total groundwater abstraction rate at  $i$ th irrigation district ( $\text{m}^3/\text{yr}$ );  $Q_{s,i}$  is total  
 417 volume of surface water diverted from  $i$ th diversion point ( $\text{m}^3/\text{yr}$ );  $N_p$  is the number of  
 418 irrigation districts;  $N_d$  is the number of diversion point based on the locations of aqueducts;  $N_t$   
 419 is the number of stress period including irrigation and non-irrigation period;  $N_w$  is total number  
 420 of pumping wells;  $q_{g,i,k}$  is the pumping rate at the  $i$ th well in  $k$ th stress period ( $\text{m}^3/\text{d}$ );  $C_g$  is the  
 421 cost per unit pumping rate per length of hydraulic lift in case of wells ( $0.015 \text{ CNY}/\text{m}^3/\text{m}$ ), and  
 422 CNY stands for Chinese Yuan;  $H_i$  is the surface elevation at the  $i$ th pumping well (m);  $h_{i,k}$  is the  
 423 groundwater level at the  $i$ th well in  $k$ th stress period (m);  $T_k$  is the length of the  $k$ th stress period  
 424 (d);  $q_{s,i,k}$  is the surface water diversion rate at the  $i$ th diversion point in  $k$ th stress period ( $\text{m}^3/\text{d}$ );  
 425  $C_s$  is the cost per unit diversion volume ( $0.055 \text{ CNY}/\text{m}^3$ );  $N_g$  is the total number of active cell  
 426 in the model domain;  $h_{end,j}$ ,  $h_{ini,j}$  is the groundwater level at the end and beginning of  
 427 management period (m);  $S y_j$  is the specific yield at  $j$ th active cell;  $A_j$  is the area of  $j$ th grid cell  
 428 ( $\text{m}^2$ );  $f_{gaging}$  outputs the surface runoff in Kaidu River at the inflow point of Bosten Lake;  $\mathbf{X}$  is a

429 water use scheme.

430 **Figure 5.**

431 The management model consists of a set of constraints given by:

432 
$$Q_{g,min} \leq Q_{g,i} \leq Q_{g,max} \quad Q_{s,min} \leq Q_{s,i} \leq Q_{s,max} \quad (11)$$

433 
$$d_{max} \leq d_c \quad h_{lake} \geq h_c \quad (12)$$

434 
$$\sum_{i=1}^{N_p} Q_{g,i} \geq TP_{min} \quad \sum_{i=1}^{N_d} Q_{s,i} \geq TD_{min} \quad (13)$$

435 
$$Q_{out,i} > 0.0 \quad (14)$$

436 where  $Q_{g,min}$  and  $Q_{g,max}$  are the capacity of total groundwater abstraction at specified irrigation  
437 district and  $Q_{g,min}$  is uniformly assumed to 1.0 million m<sup>3</sup>/yr (Mm<sup>3</sup>/yr) and  $Q_{g,max}$  is 100.0  
438 Mm<sup>3</sup>/yr;  $Q_{s,min}$  and  $Q_{s,max}$  are the constraints of surface water diversion at diversion point,  $Q_{s,min}$   
439 is 10.0 Mm<sup>3</sup>/yr at diversion points DP1 and DP2 and 5.0 Mm<sup>3</sup>/yr at DP3-DP7,  $Q_{s,max}$  is 400.0  
440 Mm<sup>3</sup>/yr at DP1 and 200.0 Mm<sup>3</sup>/yr at DP2 and 100.0 Mm<sup>3</sup>/yr at DP3-DP7;  $d_{max}$  is the maximum  
441 drawdown and must less than the permission value  $d_c$  which is set to 5 m based on the existing  
442 management schemes;  $h_{lake}$  is lake level and must greater than minimum level  $h_c$  (1045 m in  
443 this study) to divert lake water to recharge Kongqi River;  $TP_{min}$  and  $TD_{min}$  is the prescribed  
444 minimum water demands of total groundwater abstraction and total surface diversion to satisfy  
445 the agricultural development and are set to 300.0 Mm<sup>3</sup>/yr and 550.0 Mm<sup>3</sup>/yr based on the  
446 reports from the local water resources authority;  $Q_{out,i}$  represents outflow of the end reach of  $i$ th  
447 stream segment and must greater than zeros which means the potential diversion at each  
448 diversion point does not exceed the available streamflow in the current segment to avoid  
449 significant error of water budgets in the optimization (Wu et al., 2015). This study aims at  
450 optimizing spatial distribution of groundwater abstraction at different irrigation district and  
451 surface water diversion at each diversion point. The management period was set to one year

452 with duplicated model inputs and parameters from November 2012 to October 2013 including  
453 the non-irrigation and irrigation periods. Then the conjunctive management of SW and GW is  
454 implemented based on the multi-objective optimization framework carried out in MATLAB  
455 software (<http://www.mathworks.com/products/matlab>).

## 456 **4 Results and discussion**

### 457 *4.1 Pareto-optimal solutions*

458 This study applied  $\varepsilon$ -MOMA to solve the integrated SW and GW management model with  
459 four objectives ( $f_{TWS}$ ,  $f_{TCOST}$ ,  $f_{GSC}$  and  $f_{SRI}$ ) to search for optimal water use schemes. The  
460 algorithm parameters and objective epsilon values are summarized in Table 1. Fig. 6 shows a  
461 global view of tradeoff surface in a 4-dimensional coordinate plot. The management model  
462 consists of maximizing the  $f_{TWS}$ ,  $f_{GSC}$  and  $f_{SRI}$  objectives and minimizing the  $f_{TCOST}$  objective.  
463 The  $f_{TWS}$ ,  $f_{SRI}$  and  $f_{GSC}$  are plotted on the  $x$ ,  $y$  and  $z$  axes and  $f_{TCOST}$  is represented with color in  
464 Fig. 6. The green arrow indicates the direction of optimality in each objective. It can be  
465 observed that the trade-off relationship exists between  $f_{TWS}$  and other objectives ( $f_{TCOST}$ ,  $f_{GSC}$   
466 and  $f_{SRI}$ ). Augmenting the total amount of water supply increases the cost of transporting water  
467 with the solutions marked in red color and reduces surface runoff inflow to the lake and  
468 groundwater storage at the end of management period. Therefore, the regional water resources  
469 exploitation conflicts with the socioeconomic and environmental benefits in YB. The scheme  
470 before optimization is marked in red square box in Fig. 6. We can see that the scheme is  
471 located above the tradeoff surface and exhibits larger cost value. Thus, the current management  
472 scheme is sub-optimal and can be regulated to obtain optimal performances.

473 **Table 1.**

474 **Figure 6.**

475 To explain the discrepancy of the Pareto-optimal solutions, the parallel coordinates (PC) is



476 used to explore the tradeoff surface. PC is composed of  $N$  equal-spaced parallel axes  
477 representing  $N$ -dimensional objective vector. Each polyline intersecting its axis in terms of  
478 objective value represents the decision scheme in the Pareto-optimal solutions. Meanwhile, the  
479 total pumping rate ( $f_{TPR}$ ) and total surface water diversion rate ( $f_{TDR}$ ) are added to elucidate the  
480 effect of conjunctive use of SW and GW. In Fig. 7, the segments with higher  $f_{TWS}$  exist for  
481 higher  $f_{TCOST}$  and lower  $f_{GSC}$  and  $f_{SRI}$ , showing that increasing water demands requires more  
482 financial investment and depletes more surface runoff inflow to the lake and groundwater  
483 storage. The findings are consistent with the previous inferences in Fig. 6. Moreover, the many  
484 slope segments exist between  $f_{TPR}$  and  $f_{GSC}$ ,  $f_{TDR}$  and  $f_{SRI}$ , which indicates that enlarging  
485 groundwater abstraction and surface water diversion are the dominated factors for the depletion  
486 of groundwater storage and surface runoff recharge for the lake, respectively. It is noteworthy  
487 that the variation trend of  $f_{TPR}$  is very close to the change of  $f_{TWS}$  while the change in  $f_{TDR}$  exists  
488 obvious difference. The increment of  $f_{TPR}$  can be reached to 416.0 Mm<sup>3</sup>/yr whereas the growth  
489 of  $f_{TDR}$  only is 114.0 Mm<sup>3</sup>/yr across all the Pareto solutions. Therefore, groundwater abstraction  
490 can be adjusted largely to satisfy management objectives based water  
491 managers'~~decision-makers'~~ preference whereas surface water diversion should be restricted.  
492 The reasons behind this bias are that surface water diversion is highly sensitive to the lake level  
493 and the intensive groundwater abstraction augments the river leakage that indirectly causes the  
494 decrease of the available runoff.

#### 495 **Figure 7.**

#### 496 *4.2 Optimized management schedule*

497 The superiority in many-objective optimization is the full exploration of optimal solutions  
498 to avoid the decision bias derived from the lower dimensional objective formulation. The  
499 decision-makers can firstly analyze the performance of the Pareto solutions in the sub-problem

500 (e.g., single or two-objective optimization) and then explore the tradeoff solutions using the  
501 previous analysis in the higher order objective space to satisfy the multi-stakeholders' benefits.  
502 Figs. 8a-8c illustrate the projection of four-objective Pareto solutions onto two-objective space  
503 with non-dominated front of the sub-problem constructed by the  $f_{TWS}$  and other objectives  
504 ( $f_{TCOST}$ ,  $f_{GSC}$  and  $f_{SRI}$ ), respectively. As shown in Figs. 8a-8c, Solutions 1-3 are the compromise  
505 solutions in the Pareto front in the two-objective sub-problem which may be selected by the  
506 decision-makers with no preference in the certain objectives. However, these high-performance  
507 solutions in the two-objective optimization exhibit worse performance in the other objective  
508 spaces. As illustrated in the plots (Fig. 8), Solutions 2 and 3 have higher  $f_{TCOST}$  than Solution 1  
509 in Fig. 8a, Solutions 1 and 3 have lower  $f_{GSC}$  than Solution 2 in Fig. 8b and Solutions 1 and 2  
510 show lower  $f_{SRI}$  than Solution 3 in Fig. 8c. Therefore, the decision-makers need identify the true  
511 compromise solution that performs well in the multiple objectives simultaneously. In this study,  
512 Solution 4 is closest to the corresponding objective values of the compromise solutions  
513 (Solutions 1-3) simultaneously and can be the true compromise solution in the 4-dimensional  
514 tradeoff surface. Additionally, Solution 5 has the largest objective value of total water supply  
515 rate in the approximate Pareto front satisfying the constraints of maximum groundwater  
516 drawdown and minimum lake level. Solution 6 corresponds to the compromise solution in the  
517 non-dominated front of  $f_{GSC}$  and  $f_{SRI}$ , which indicates the perfect performance in the protection  
518 of regional groundwater storage and water balance of the lake.

519 **Figure 8.**

520 In this study, Solutions 4, 5 and 6 are selected to elucidate the variation of groundwater  
521 abstraction and surface water diversion compared with the scheme before optimization  
522 (Solution 7). The objective values of selected solutions are listed in Table 2. It can be observed  
523 that Solution 4 can achieve similar total water supply rate while the cost of water delivery can  
524 reduce 34.4% compared with Solution 7. The result shows that Solution 7 is sub-optimal from

525 the aspect of expenditure of water supply. Moreover, the surface runoff inflow to lake in  
526 Solution 4 achieves the increment of 38.2 Mm<sup>3</sup>/yr and the depletion in groundwater storage  
527 obtains the reduction of 19.9 Mm<sup>3</sup>/yr. However,  $f_{GSC}$  of Solution 4 is still less than zero, which  
528 demonstrates the loss of groundwater storage compared with initial state. Therefore, Solution 6  
529 is a preferred water use scheme from the aspects of the maximization of groundwater storage  
530 and surface runoff inflow to lake simultaneously. The objectives of Solution 6 in Table 2 show  
531 reducing 143.0 Mm<sup>3</sup>/yr of  $f_{TWS}$  in the scheme before optimization can achieve the increment of  
532 groundwater storage with 21.9 Mm<sup>3</sup>/yr and augment 63.0 Mm<sup>3</sup>/yr of surface runoff inflow to  
533 lake. Solution 5 represents the potential of water resources exploitation in YB and can augment  
534 26% of total water supply rate compared with Solution 7. Interestingly, it can be found that, in  
535 Solutions 5 and 7, groundwater storage depletion (83.9 Mm<sup>3</sup>/yr) is more rapid than the  
536 reduction of surface runoff inflow to the lake (18.5 Mm<sup>3</sup>/yr). Hence, groundwater abstraction is  
537 probably preferred option to provide the resiliency of water supply in the face of the increased  
538 water demands.

539 **Table 2.**

540 Fig. 9 illustrated the spatial distribution of the pumping rates of the selected solutions at  
541 11 irrigation districts. As shown in Figs. 9a and 9b, Solution 4 shows groundwater abstraction  
542 in the ID3, ID5 and ID7-ID11 can be increased in comparison to Solution 7. It can be noted  
543 that the pumping rates in ID7 and ID9 can be largely elevated due to lower exploitation in the  
544 past and shallow groundwater depth. The groundwater abstraction in ID1, ID2, ID4 and ID6  
545 should be reduced especially for the pumping rate in ID6 which exhibits abrupt decline. As  
546 shown in Fig. 9c, Solution 5 with the maximization of  $f_{TWS}$  demonstrates that a large amount of  
547 groundwater can be abstracted in the ID5-ID9 (greater than 80.0 Mm<sup>3</sup>/yr) which implies water  
548 managers can implement groundwater abstraction in those districts to satisfy the augmentation  
549 of water supply. In Fig. 9d, Solution 6 is a desired scheme with the maximization of

550 environment benefits in groundwater storage and runoff recharge to the lake. The spatial  
551 differentiation of groundwater abstraction in Solution 6 is similar with those in the  
552 4-dimensional compromise solution (Solution 4). However, Solution 6 based the pumping rates  
553 in the ID5 and ID8 show obvious decline, which implies that water managers can lower the  
554 groundwater abstraction in these regions to achieve more environment benefit in groundwater  
555 storage.

556 **Figure 9.**

557 Fig. 10 illustrates the spatial patterns of surface water diversion along the main stream of  
558 Kaidu River. As show in Fig. 10a, seven diversion points (DP1-DP7) with the reduction of  
559 runoff are clearly identified. The runoff at the 35 km from DP1 exhibits obvious rise due to the  
560 inflow in the tributary. The river runoff at the lake inflow point is the surface runoff inflow to  
561 the lake that is  $f_{SRI}$  objective. It can be observed that the surface runoff in the scheme before  
562 optimization (Solution 7) in DP1 shows the abrupt decline than Pareto-optimal solutions  
563 (Solutions 4, 5 and 6) which responds to the distribution of surface diversion in Fig. 10b.  
564 Moreover, Solution 7 has the lowest runoff between DP1 and DP4 even though exists slight  
565 increase in the lake inflow point. Therefore, a significant increase of surface water diversion in  
566 DP1 controls the available runoff in the downstream segments. The water managers should  
567 reduce the surface water diversion in DP1 to ensure sufficient runoff in the lower reaches of  
568 Kaidu River for the adjustment of multi-stakeholders' benefits. Solution 4 is a compromise  
569 scheme that exhibits lower runoff compared with Solution 6 from DP4 to the end of river, due  
570 to the larger water diversion in DP4, which triggers the reduction of surface runoff inflow to  
571 lake. Solution 5 is a potential of regional water resources exploitation in YB and has smaller  
572 available runoff than Solutions 4 and 6, approximating to more water diversion in Kaidu River.  
573 Fig. 10c further demonstrates the interaction of surface water and groundwater along the  
574 mainstream of the river. The upper segment (Segment I) is a losing segment that means surface

575 water exchange from stream to aquifer and the middle segment (Segment II) is a gaining  
576 segment that indicates groundwater exchange from aquifer to stream. Then the lower segment  
577 (Segment III) turns into a losing segment. It can be noted that Segment I and Segment II have  
578 strong interaction between SW and GW whereas Segment III exhibits exchange with a lower  
579 leakage rate. As illustrated in Fig. 10d, the distribution of total river leakage shows that  
580 Solution 5 with the potential of water supply corresponds to the maximum river leakage caused  
581 by the maximum groundwater abstraction. The river leakage in Solutions 6 and 7 corresponds  
582 to lower groundwater abstraction. Consequently, groundwater abstraction is a dominated factor  
583 for the interaction of SW and GW in the basin. The river leakage in Solution 4 is clearly larger  
584 than Solution 7, which is seemingly undesired for water managers. However, augmenting  
585 groundwater abstraction ( $131.0 \text{ Mm}^3/\text{yr}$ ) at the cost of river leakage ( $30.0 \text{ Mm}^3/\text{yr}$ ) can lower  
586 surface water diversion ( $67.0 \text{ Mm}^3/\text{yr}$ ) that is highly sensitive to the runoff inflow to Bosten  
587 Lake. Therefore, groundwater abstraction is probably a desired water use pattern in YB.

588 **Figure 10.**

#### 589 *4.3 Impacts of runoff change*

590 Kaidu River plays a crucial role to sustain regional water balance in YB and flows through  
591 Dashankou station (Fig. 2) into the basin. The river supplies the majorities of surface water  
592 diversion by an aqueduct system for agricultural irrigation and constitutes about 97% of total  
593 annual inflow to the Bosten Lake. The runoff in Kaidu River is mainly originated from  
594 mountainous precipitation and melting glacier water in the Tianshan Mountains region.  
595 However, the remarkable climate changes have caused a significant increase in both  
596 temperature and precipitation over the past 50 years in Xinjiang (Li et al., 2013). The changing  
597 climate probably increased the glacier melt and snowmelt in the upper part of Kaidu River and  
598 then caused the growth of the river runoff between 1999 and 2002, with the highest runoff in

599 2002 of 5.7 billion m<sup>3</sup>/year (Zhou et al., 2015). However, the long-term climate change may  
600 reduce runoff in Kaidu River attributing to the depletion of small or mid-size glaciers and snow  
601 line receding in the middle Tianshan Mountains region. Li et al., (2012) observed that surface  
602 area of snow in Kaidu River Basin reduced largely between 2000 and 2010. Therefore, it is  
603 essential to explore the impact of runoff reduction in Kaidu River on the regional water  
604 resources management for the local socioeconomic and environmental development.

605 The last part of our study implemented multi-objective optimization by resetting the  
606 runoff inflow at the first diversion point (DP1) in Kaidu River with the duplicated model  
607 parameters and the inputs of source and sink terms. We defined three scenarios which are to  
608 maintain the current runoff (Scenario A0), reduce 10% of the runoff (Scenario A1) and reduce  
609 20% of the runoff (Scenario A2), respectively. In the management model, the constraint of lake  
610 level is altered to the smaller value (1044.5m) and maximum groundwater drawdown is reset to  
611 10m to avoid much more infeasible solutions in the population, which probably inhibits the  
612 convergence of the optimization. Fig. 11 shows all Pareto-optimal solutions in the  
613 4-dimensional objective space under different runoff change scenarios. It is clearly observed  
614 that the tradeoff surface with current runoff (Scenario A0) is closest to the ideal solution and  
615 those with runoff reduction are farther from the solution. Scenario A2 based solutions exhibit  
616 worst performance owing to the greatest extent of runoff reduction. Moreover, we rescaled the  
617 objective range to the interval [0, 1] and set the reference point to the objective vector [1, 1, 1,  
618 1] to calculate the HV metric of approximate Pareto solutions under the runoff scenarios. Fig.  
619 12 shows the evolution of HV and the number of generation. Judged from the performance  
620 evolution, tradeoff solutions under Scenario A0 achieve the largest HV and those in Scenario  
621 A2 have the lowest HV, which shows the solutions are far away from the ideal Pareto solution.  
622 Therefore, the exploitation extent of surface diversion and groundwater abstraction should be  
623 diminished in the face of runoff reduction related to climate change. In Fig. 11, the

624 approximate Pareto solutions in Scenarios A0-A2 does not exist when  $f_{SRI}$  is greater than  
625 1801.33 Mm<sup>3</sup>/yr in Scenario A0, a certain value 1596.33 Mm<sup>3</sup>/yr in Scenario A1 and 1374.58  
626 Mm<sup>3</sup>/yr in Scenario A2, which means the loss of diversity of Pareto solutions. The reason is  
627 that augmenting  $f_{TWS}$  causes more decline of  $f_{SRI}$  and the lake level compared with no reduction  
628 in runoff in Scenario A0, which probably generates a large amount of unfeasible solutions  
629 violating the constraint of minimum lake level. The finding also shows that runoff in Kaidu  
630 River through YB is a dominant factor controlling the variation of Bosten Lake level. To  
631 investigate the effect of runoff reduction on the environmental benefits, Fig. 13 shows the  
632 non-dominated fronts in the  $f_{GSC}$  and  $f_{SRI}$  objectives space across Scenarios A0, A1 and A2. The  
633 solutions in Scenario A2 are completely dominated by the solutions in Scenarios A0 and A1.  
634 Scenario A0 based solutions show the best Pareto optimality. Therefore, the runoff reduction  
635 results in obvious loss of environmental benefits. It is noteworthy that  $f_{SRI}$  with Scenarios A1  
636 and A2 will be reduced under the similar  $f_{GSC}$ . In the optimization, in order to maximize  
637 irrigation water supply, sustaining similar groundwater storage in Scenarios A1 and A2 has to  
638 be at the cost of river runoff decline to increase surface water diversion. Hence, it is essential  
639 for water managers to realize the conflict of conjunctive use of SW and GW for the water  
640 resources management in arid inland basin.

641 **Figure 11.**

642 **Figure 12.**

643 **Figure 13.**

## 644 **5. Conclusions**

645 The study proposed a multi-objective optimization framework for the integrated surface  
646 water and groundwater management and demonstrated its effectiveness through a spatial  
647 optimization of water use practices for the agricultural irrigation in YB~~Yanqi~~ Basin, a typical

648 arid inland basin in northwest China. The well-calibrated simulation model with  
649 MODFLOW-NWT was developed to model the interaction of surface water (*i.e.*, Kaidu River  
650 and Bosten Lake) and groundwater. Then this study presented a new MOEA (the epsilon  
651 multi-objective memetic algorithm,  $\epsilon$ -MOMA) and linked it with the numerical model to solve  
652 the multi-objective management model. The optimization model is composed of the four  
653 conflicting objectives: maximizing total water supply rate, minimizing total cost of  
654 transporting water from water intake points to water use destinations, maximizing the  
655 groundwater storage in the aquifer and maximizing the surface runoff inflow from Kaidu River  
656 to Bosten Lake. An interactive visualization tool was applied to explore 4-dimensional tradeoff  
657 surface in a global view. Results showed augmenting water supply caused the larger cost of  
658 water delivery, reduced the runoff inflow to lake and aggravated the loss of groundwater  
659 storage. The 2-dimensional compromise schemes selected from the non-dominated fronts  
660 between  $f_{TWS}$  and other objectives exhibited significant decision bias in the higher order  
661 objective spaces. Therefore, it is crucial for water managers~~decision-makers~~ to explore water  
662 management schemes in the multi-objective tradeoff surface.

663 The 4-dimensional compromise solution is obtained to investigate performance of existing  
664 scheme. Result shows that the water use practices before optimization have to be regulated to  
665 avoid unnecessary capital expenditure of transporting water. However, the compromised  
666 solution indicates groundwater storage is still decreasing. Thus, the water managers may be  
667 inclined to adopt the Pareto-optimal scheme satisfying minimum water demands to prevent the  
668 loss of groundwater storage and runoff inflow to the lake. In the practical application, the water  
669 managers~~decision-makers~~ should identify specific irrigation water demands and environmental  
670 constraints to discover preferred water use schemes. Moreover, the regulation of groundwater  
671 abstraction is more flexible than surface water diversion in the Pareto-optimal solutions, which  
672 is an important implication for the resiliency of water resources management. The water use



673 schemes are subject to the spatial complexity of strong SW-GW interaction. That is to say, the  
674 integrated management of SW-GW is highly desired to reflect the interaction of water  
675 resources system in the optimization. The scenarios of runoff change were then generated to  
676 investigate the effect of runoff depletion in Kaidu River on the regional water resources  
677 management. The findings showed that reducing runoff inflow to the basin could lead to the  
678 degradation of Pareto solutions compared with those based on the current runoff scenario. In  
679 this light, it is crucial to implement stringent water management and explore potential  
680 water-saving strategies under the future conditions.

681 The findings are applicable to regional water resources management in other typical arid  
682 inland basins with complex groundwater-river-lake interactions and intensive agricultural  
683 development. However, due to the data-scarcity in the basin-scale water cycle and limitations  
684 of simulation model, the current model may be not enough to reflect the true response of water  
685 resources systems. Future research should focus on exploiting fully coupled numerical model  
686 to accurately simulate basin-scale water cycle and avoid decision bias derived from the  
687 numerical model. Meanwhile, deep uncertainty (*e.g.*, land use change, climate change, etc.) is a  
688 key factor to affect the robustness and reliability of the optimal solutions in the changing world.  
689 In the simulation-optimization framework, integrating these factors into the management  
690 model to explore optimal schemes is a research focus in the future.

## 691 **Acknowledgements**

692 This study is jointly supported by the National Natural Science Foundation of China  
693 (41730856 and 41772254) and the National Key Research and Development Plan of China  
694 (2016YFC0402800). The numerical calculations in this study have been implemented on the  
695 IBM Blade cluster system in the High Performance Computing Center of Nanjing University,  
696 China. In particular, the authors are grateful to Referee Dr. Joseph Kasprzyk of the University  
697 of Colorado at Boulder for his insightful comments and invaluable suggestions on the

698 manuscript.

## 699 **References**

700 Bader, J. and Zitzler, E.: HypE: an algorithm for fast hypervolume-based many-objective  
701 optimization, *Evol. Comput.*, 19(1), 45-76, [doi:10.1162/EVCO\\_a\\_00009](https://doi.org/10.1162/EVCO_a_00009), 2011.

702 Beh, E.H., Zheng, F., Dandy, G.C., Maier, H.R., and Kapelan, Z.: Robust optimization of water  
703 infrastructure planning under deep uncertainty using metamodels, *Environ. Model.  
704 Softw.*, 93, 92-105, [doi:10.1016/j.envsoft.2017.03.013](https://doi.org/10.1016/j.envsoft.2017.03.013), 2017.

705 Chen, B., Zeng, W.H., Lin, Y.B., and Zhang, D.F.: A new local search-based multiobjective  
706 optimization algorithm, *IEEE Trans.*, 19(1), 50-73, [doi:10.1109/TEVC.2014.2301794](https://doi.org/10.1109/TEVC.2014.2301794),  
707 2015.

708 Chen, Y., Chen, Y., Xu, C., Ye, Z., Li, Z., Zhu, C., and Ma, X.: Effects of ecological water  
709 conveyance on groundwater dynamics and riparian vegetation in the lower reaches of  
710 Tarim River, China, *Hydrol. Process.*, 24, 170-177, [doi:10.1002/hyp.7429](https://doi.org/10.1002/hyp.7429), 2010.

711 Deb, K. and Agrawal, R.B.: Simulated binary crossover for continuous search space, Indian  
712 Institute of Technology, Kanpur, UP, India, Tech. Rep. IITK/ME/SMD-94027, Nov. 1994.

713 Deb, K., Joshi, D., and Anand, A.: Real-coded evolutionary algorithms with parent-centric  
714 recombination, *Computation Intelligence, Proceedings of the World on Congress on*, 1,  
715 61-66, 2002.

716 Deb, K., Pratap, A., Agarwal, S., and Meyarivan, T.: A fast and elitist multi-objective genetic  
717 algorithm: NSGA-II, *IEEE Trans.*, 6(2), 182-197, [doi:10.1109/4235.996017](https://doi.org/10.1109/4235.996017), 2002.

718 Deb, K., Thiele, L., Laumanns, M., and Zitzler, E.: Scalable multi-objective optimization test  
719 problems, in: *proceeding of the congress on evolutionary computation (CEC-2002)*,  
720 825-830, 2002.

721 Deep, K. and Thakur, M.: A new crossover operator for real coded genetic algorithms, *Appl.  
722 Math. Comput.*, 188, 895-911, [doi:10.1016/j.amc.2006.10.047](https://doi.org/10.1016/j.amc.2006.10.047), 2007.

- 723 Eker, S. and Kwakkel, J.H.: Including robustness considerations in the search phase of  
724 Many-Objective Robust Decision Making, *Environ. Model. Softw.*, 105, 201-216,  
725 [doi:10.1016/j.envsoft.2018.03.029](https://doi.org/10.1016/j.envsoft.2018.03.029), 2018.
- 726 Fleming, P., Purshouse, R., and Lygoe, R.: Many-objective optimization: an engineering design  
727 perspective. In: Coello Coello, C., Hernández Aguirre, A., Zitzler, E. (Eds.), *Evolutionary*  
728 *Multi-Criterion Optimization. Lecture Notes in Computer Science*. Springer, Berlin  
729 Heidelberg, 14-32, 2005.
- 730 Gao, H. and Yao, Y.: Quantitative effect of human activities on water level change of Bosten  
731 Lake in recent 50 years, *Scientia Geographica Sinica*, 25, 3305-3309, 2005 (in Chinese  
732 with English abstract).
- 733 Hadka, D., Herman, J., Reed, P., and Keller, K.: An open source framework for many objective  
734 robust decision making, *Environ. Model. Softw.*, 74, 114-129,  
735 [doi:10.1016/j.envsoft.2015.07.014](https://doi.org/10.1016/j.envsoft.2015.07.014), 2015.
- 736 Hadka, D. and Reed, P.M.: Borg: an auto-adaptive many-objective framework, *Evol. Comput*,  
737 21(2), 213-259, [doi:10.1162/EVCO\\_a\\_00075](https://doi.org/10.1162/EVCO_a_00075), 2013.
- 738 Hao, X. and Li, W.: Impacts of ecological water conveyance on groundwater dynamics and  
739 vegetation recovery in the lower reaches of the Tarim River in northwest China, *Environ.*  
740 *Monit. Assess.*, 186(11), 7605-7616, [doi:10.1007/s10661-014-3952-x](https://doi.org/10.1007/s10661-014-3952-x), 2014.
- 741 Hassanzadeh, E., Elshorbagy, A., Wheater, H., and Gober, P.: Managing water in complex  
742 systems: An integrated water resources model for Saskatchewan, Canada, *Environ.*  
743 *Model. Softw.*, 58, 12-26, [doi:10.1016/j.envsoft.2014.03.015](https://doi.org/10.1016/j.envsoft.2014.03.015), 2014.
- 744 Hu, L.T., Chen, C.X., Jiao, J.J., and Wang, Z.J.: Simulated groundwater interaction with rivers  
745 and springs in the Heihe river basin, *Hydrol. Process.*, 21(20), 2794-2806,  
746 [doi:10.1002/hyp.6497](https://doi.org/10.1002/hyp.6497), 2007.
- 747 Inselberg, A.: *Parallel Coordinates: Visual Multidimensional Geometry and Its Applications*,

748 Springer, New York, USA, [doi:10.1007/978-0-387-68628-8](https://doi.org/10.1007/978-0-387-68628-8), 2009.

749 Kasprzyk, J.R., Reed, P.M., Characklis, G.W., and Kirsch, B.R.: Many-objective *de Novo* water  
750 supply portfolio planning under deep uncertainty, *Environ. Model. Softw.*, 34, 87-104,  
751 [doi:10.1016/j.envsoft.2011.04.003](https://doi.org/10.1016/j.envsoft.2011.04.003), 2012.

752 Kasprzyk, J.R., Reed, P.M., and Hadka, D.M.: Battling arrow's paradox to discover robust  
753 water management alternatives, *J. Water Resour. Plan. Manag.*, 142(2), 04015053,  
754 [doi:10.1061/\(ASCE\)WR.1943-5452.0000572](https://doi.org/10.1061/(ASCE)WR.1943-5452.0000572), 2015.

755 Khare, D., Jat, M.K., and Ediwahyunan.: Assessment of conjunctive use planning options: a  
756 case study of Sapon irrigation command area of Indonesia, *J. Hydrol.*, 328(3-4), 764-777,  
757 [doi:10.1016/j.jhydrol.2006.01.018](https://doi.org/10.1016/j.jhydrol.2006.01.018), 2006.

758 Kollat, J.B. and Reed, P.: A framework for visually interactive decision-making and design  
759 using evolutionary multi-objective optimization (VIDEO), *Environ. Model. Softw.*, 22  
760 (12), 1691-1704, [doi:10.1016/j.envsoft.2007.02.001](https://doi.org/10.1016/j.envsoft.2007.02.001), 2007.

761 Laumanns, M., Thiele, L., Deb, K., and Zitzler, E.: Combining convergence and diversity in  
762 evolutionary multi-objective optimization, *Evol. Comput.*, 10(3), 263-282,  
763 [doi:10.1162/106365602760234108](https://doi.org/10.1162/106365602760234108), 2002.

764 Li, B., Chen, Y., Shi, X., Chen, Z., and Li, W.: Temperature and precipitation changes in  
765 different environments in the arid region of northwest China, *Theor. Appl. Climatol.*, 112,  
766 589-596, [doi:10.1007/s00704-012-0753-4](https://doi.org/10.1007/s00704-012-0753-4), 2013.

767 Li, Q., Li, L.H., and Bao, A.M.: Snow cover change and impact on streamflow in the Kaidu  
768 River Basin, *Resources Science*, 34, 91-97, 2012 (in Chinese with English abstract).

769 Liu, L., Luo, Y., He, C., Lai, J., and Li, X.: Roles of the combined irrigation, drainage, and  
770 storage of the canal network in improving water reuse in the irrigation districts along the  
771 lower Yellow River, China, *J. Hydrol.*, 391(1-2), 157-174,  
772 [doi:10.1016/j.jhydrol.2010.07.015](https://doi.org/10.1016/j.jhydrol.2010.07.015), 2010.

773 Liu, L., Zhao, J., Zhang, J., Peng, W., Fan, J., and Zhang, T.: Water balance of Lake Bosten  
774 using annual water-budget method for the past 50 years, *Arid Land Geography*, 36, 33-40,  
775 2013 (in Chinese with English abstract).

776 Maier, H.R., Guillaume, J.H.A., van Delden, H., Riddell, G.A., Haasnoot, M., and Kwakkel,  
777 J.H.: An uncertain future, deep uncertainty, scenarios, robustness and adaptation: How do  
778 they fit together? *Environ. Model. Softw.*, 81, 154-164, [doi:  
779 10.1016/j.envsoft.2016.03.014](https://doi.org/10.1016/j.envsoft.2016.03.014), 2016.

780 Maier, H.R., Kapelan, Z., Kasprzyk, J., Kollat, J., Matott, L.S., Cunha, M.C., Dandy, G.C.,  
781 Gibbs, M.S., Keedwell, E., Marchi, A., Ostfeld, A., Savic, D., Solomatine, D.P., Vrugt,  
782 J.A., Zecchin, A.C., Minsker, B.S., Barbour, E.J., Kuczera, G., Pasha, F., Castelletti, A.,  
783 Giuliani, M., and Reed., P.M.: Evolutionary algorithms and other metaheuristics in water  
784 resources: current status, research challenges and future directions, *Environ. Model.  
785 Softw.*, 62, 271-299, [doi:10.1016/j.envsoft.2014.09.013](https://doi.org/10.1016/j.envsoft.2014.09.013), 2014.

786 Maier, H.R., Razavi, S., Kapelan, Z., Matott, L.S., Kasprzyk, J., and Tolson, B.A.: Introductory  
787 overview: Optimization using evolutionary algorithms and other metaheuristics, *Environ.  
788 Model. Softw.*, 114, 195-213. [doi:10.1016/j.envsoft.2018.11.018](https://doi.org/10.1016/j.envsoft.2018.11.018), 2019.

789 Mamat, Z., Yimit, H., Ji, R.Z.A., and Eziz, M.: Source identification and hazardous risk  
790 delineation of heavy metal contamination in Yanqi basin, northwest China, *Sci. Total  
791 Environ.*, 493, 1098-1111, [doi:10.1016/j.scitotenv.2014.03.087](https://doi.org/10.1016/j.scitotenv.2014.03.087), 2014.

792 Matteo, M.D., Maier, H.R., and Dandy, G.C.: Many-objective portfolio optimization approach  
793 for stormwater management project selection encouraging decision maker buy-in,  
794 *Environ. Model. Softw.*, 111, 340-355, [doi:10.1016/j.envsoft.2018.09.008](https://doi.org/10.1016/j.envsoft.2018.09.008), 2019.

795 McPhee, J. and Yeh, W.W.G.: Multiobjective optimization for sustainable groundwater  
796 management in semiarid regions, *J. Water Resour. Plan. Manag.*, 130(6), 490-497,  
797 [doi:10.1061/\(ASCE\)0733-9496\(2004\)130:6\(490\)](https://doi.org/10.1061/(ASCE)0733-9496(2004)130:6(490)), 2004.

798 Michael, L.M. and Leonard, F.K.: Documentation of a Computer Program to Simulate  
799 Lake-aquifer Interaction Using the Modflow Ground-water Flow Model and the Moc3d  
800 Solute-transport Model, U.S. Geological Water-Resources Investigations Report, 2000.

801 Niswonger, R.G., Panday, S., and Ibaraki, M.: MODFLOW-NWT, A Newton formulation for  
802 MODFLOW-2005: US Geological Survey Techniques and Methods 6-A37, 44 p, 2011.

803 Parsapour-Moghaddam, P., Abed-Elmdoust, A., and Kerachian, R.: A heuristic evolutionary  
804 game theoretic methodology for conjunctive use of surface and groundwater resources,  
805 Water Resour. Manag., 29(11), 3905-3918, [doi:10.1007/s11269-015-1035-6](https://doi.org/10.1007/s11269-015-1035-6), 2015.

806 Purshouse, R.C. and Fleming, P.J.: On the evolutionary optimization of many conflicting  
807 objectives, IEEE Trans., 11(6), 770-784, [doi:10.1109/TEVC.2007.910138](https://doi.org/10.1109/TEVC.2007.910138), 2007.

808 Reed, P.M., Hadka, D., Herman, J.D., Kasprzyk, J.R., and Kollat, J.B.: Evolutionary  
809 multiobjective optimization in water resources: The past, present and future, Adv Water  
810 Resour., 51, 438-456, [doi:10.1016/j.advwatres.2012.01.005](https://doi.org/10.1016/j.advwatres.2012.01.005), 2013.

811 Richard, G.N. and David, E.P.: Documentation of the Streamflow-Routing (SFR2) Package to  
812 Include Unsaturated Flow Beneath Streams-A Modification to SFR1, U.S. Geological  
813 Survey Techniques and Methods, pp. 6-A13, 2010.

814 Rothman, D. and Mays, L.W.: Water resources sustainability: development of a multi-objective  
815 optimization model, J. Water Resour. Plan. Manag., 140(12), 04014039,  
816 [doi:10.1061/\(ASCE\)WR.1943-5452.0000425](https://doi.org/10.1061/(ASCE)WR.1943-5452.0000425), 2013.

817 Safavi, H.R. and Esmikhani, M.: Conjunctive use of surface water and groundwater:  
818 application of support vector machines (SVMs) and genetic algorithms, Water Resour.  
819 Manag., 27(7), 2623-2644, [doi:10.1007/s11269-013-0307-2](https://doi.org/10.1007/s11269-013-0307-2), 2013.

820 Sindhya, K., Deb, K., and Miettinen, K.: Improving convergence of evolutionary  
821 multiobjective optimization with local search: a concurrent-hybrid algorithm, Nat.  
822 Comput., 10(4), 1407-1430, [doi:10.1007/s11047-011-9250-4](https://doi.org/10.1007/s11047-011-9250-4), 2011.

823 Sindhya, K., Miettinen, K., and Deb, K.: A hybrid framework for evolutionary multiobjective  
824 optimization. *IEEE Trans.*, 17(4), 495-511, [doi:10.1109/TEVC.2012.2204403](https://doi.org/10.1109/TEVC.2012.2204403), 2013.

825 Singh, A.: Simulation-optimization modeling for conjunctive water use management, *Agric.*  
826 *Water Manag.*, 141, 23-29, [doi:10.1016/j.agwat.2014.04.003](https://doi.org/10.1016/j.agwat.2014.04.003), 2014.

827 Singh, A. and Panda, S.N.: Optimization and simulation modelling for managing the problems  
828 of water resources, *Water Resour. Manag.*, 27(9), 3421-3431,  
829 [doi:10.1007/s11269-013-0355-7](https://doi.org/10.1007/s11269-013-0355-7), 2013.

830 Storn, R. and Price, K.: Differential evolution - a simple and efficient heuristic for global  
831 optimization over continuous spaces, *J. Global Optim.*, 11(4), 341-359,  
832 [doi:10.1023/A:1008202821328](https://doi.org/10.1023/A:1008202821328), 1997.

833 Tian, Y., Zheng, Y., Wu, B., Wu, X., Liu, J., and Zheng, C.: Modeling surface  
834 water-groundwater interaction in arid and semi-arid regions with intensive agriculture,  
835 *Environ. Model. Softw.*, 63, 170-184, [doi:10.1016/j.envsoft.2014.10.011](https://doi.org/10.1016/j.envsoft.2014.10.011), 2015.

836 Tsutsui, S., Yamamura, M., and Higuchi, T.: Multi-parent recombination with simplex  
837 crossover in real coded genetic algorithms, in *Genetic and Evolutionary Computation*  
838 *Conference (GECCO 1999)*, 1999.

839 Wang, W., Wang, X., Jiang, F., and Peng, D.: Response of runoff volume to climate change in  
840 the Kaidu River Basin in recent 30 years, *Arid Zone research*, 30, 743-748, 2013 (in  
841 Chinese with English abstract).

842 Wang, Y., Chen, Y., and Li, W.: Temporal and spatial variation of water stable isotopes ( $^{18}\text{O}$  and  
843  $^2\text{H}$ ) in the Kaidu River basin, Northwest China, *Hydrol. Process.*, 28(3), 653-661,  
844 [doi:10.1002/hyp.9622](https://doi.org/10.1002/hyp.9622), 2014.

845 Wichelns, D. and Oster, J.D.: Sustainable irrigation is necessary and achievable, but direct  
846 costs and environmental impacts can be substantial, *Agric. Water Manag.*, 86(1-2),  
847 114-127, [doi:10.1016/j.agwat.2006.07.014](https://doi.org/10.1016/j.agwat.2006.07.014), 2006.

- 848 Woodruff, M.J., Reed, P.M., and Simpson, T.W.: Many objective visual analytics: rethinking  
849 the design of complex engineered systems, *Struct. Multidisc. Optim.*, 48(1), 201-219,  
850 [doi:10.1007/s00158-013-0891-z](https://doi.org/10.1007/s00158-013-0891-z), 2013.
- 851 Wu, B., Zheng, Y., Tian, Y., Wu, X., Yao, Y., Han, F., Liu, J., and Zheng, C.: Systematic  
852 assessment of the uncertainty in integrated surface water-groundwater modeling based on  
853 the probabilistic collocation method, *Water Resour. Res.*, 50, 5848-5865,  
854 [doi:10.1002/2014WR015366](https://doi.org/10.1002/2014WR015366), 2014.
- 855 Wu, B., Zheng, Y., Wu, X., Tian, Y., Han, F., Liu, J., and Zheng, C.: Optimizing water  
856 resources management in large river basins with integrated surface water-groundwater  
857 modeling: A surrogate-based approach, *Water Resour. Res.*, 51, 2153-2173,  
858 [doi:10.1002/2014WR016653](https://doi.org/10.1002/2014WR016653), 2015.
- 859 Wu, M., Wu, J., Lin, J., Zhu, X., Wu, J., and Hu, B.X.: Evaluating the interactions between  
860 surface water and groundwater in the arid mid-eastern Yanqi Basin, northwest China,  
861 *Hydrolog. Sci. J.*, 63(9), 1313-1331, [doi:10.1080/02626667.2018.1500744](https://doi.org/10.1080/02626667.2018.1500744), 2018.
- 862 Wu, X., Zheng, Y., Wu, B., Tian, Y., Han, F., and Zheng, C.M.: Optimizing conjunctive use of  
863 surface water and groundwater for irrigation to address human-nature water conflicts: A  
864 surrogate modeling approach, *Agric. Water Manag.*, 163, 380-392,  
865 [doi:10.1016/j.agwat.2015.08.022](https://doi.org/10.1016/j.agwat.2015.08.022), 2016.
- 866 Xiao, M., Wu F., Liao, H., Li, W., Lee, X., and Huang, R.: Characteristics and distribution of  
867 low molecular weight organic acids in the sediment porewaters in Bosten Lake, China, *J.*  
868 *Environ. Sci.*, 22(3), 328-337, [doi:10.1016/S1001-0742\(09\)60112-1](https://doi.org/10.1016/S1001-0742(09)60112-1), 2010.
- 869 Xu, H., Ye, M., Song, Y., and Chen, Y.: The natural vegetation responses to the groundwater  
870 change resulting from ecological water conveyances to the lower Tarim River, *Environ.*  
871 *Monit. Assess.*, 131(1-3), 37-48, [doi:10.1007/s10661-006-9455-7](https://doi.org/10.1007/s10661-006-9455-7), 2007.
- 872 Xu, J., Chen, Y., Bai, L., and Xu, Y.: A hybrid model to simulate the annual runoff of the Kaidu



873 River in northwest China, *Hydrol. Earth Syst. Sci.*, 20, 1447-1457,  
874 [doi:10.5194/hess-20-1447-2016](https://doi.org/10.5194/hess-20-1447-2016), 2016.

875 Yang, C.C., Chang, L.C., Chen, C.S., and Yeh, M.S.: Multi-objective planning for conjunctive  
876 use of surface and subsurface water using genetic algorithm and dynamics programming.  
877 *Water Resour. Manag.*, 23(3), 416-437, [doi:10.1007/s11269-008-9281-5](https://doi.org/10.1007/s11269-008-9281-5), 2009.

878 Yao, J., Chen, Y., Zhao, Y., and Yu, X.: Hydro climatic changes of Lake Bosten in Northwest  
879 China during the last decades, *Sci Rep.*, 8, 9118, [doi:10.1038/s41598-018-27466-2](https://doi.org/10.1038/s41598-018-27466-2), 2018.

880 Yao, Y., Zheng, C., Liu, J., Cao, G., Xiao, H., Li, H., and Li, W.: Conceptual and numerical  
881 models for groundwater flow in an arid inland river basin, *Hydrol. Process.*, 29,  
882 1480-1492, [doi:10.1002/hyp.10276](https://doi.org/10.1002/hyp.10276), 2015.

883 Zhang, Z., Hu, H., Tian, F., Yao, X., and Sivapalan, M.: Groundwater dynamics under  
884 water-saving irrigation and implications for sustainable water management in an oasis:  
885 Tarim River basin of western China, *Hydrol. Earth Syst. Sci.*, 18, 3951-3967,  
886 [doi:10.5194/hess-18-3951-2014](https://doi.org/10.5194/hess-18-3951-2014), 2014.

887 Zheng, F., Zecchin, A.C., Maier, H.R., and Simpson, A.R.: Comparison of the searching  
888 behavior of NSGA-II, SAMODE, and Borg MOEAs applied to water distribution system  
889 design problems, *J. Water Resour. Plann. Manage.*, 142(7), 04016017,  
890 [doi:10.1061/\(ASCE\)WR.1943-5452.0000650](https://doi.org/10.1061/(ASCE)WR.1943-5452.0000650), 2016.

891 Zhou, H., Cheng, Y., Perry, L., and Li, W.: Implications of climate change for water  
892 management of an arid inland lake in Northwest China, *Lake Reserv Manage.*, 31(3),  
893 202-213, [doi:10.1080/10402381.2015.1062834](https://doi.org/10.1080/10402381.2015.1062834), 2015.

894 Zizler, E., Thiele, L., Laumanns, M., Fonseca, C., da Fonseca, V.: Performance assessment of  
895 multiobjective optimizers: an analysis and review. *IEEE Trans.*, 7(2), 117-132,  
896 [doi:10.1109/TEVC.2003.810758](https://doi.org/10.1109/TEVC.2003.810758), 2003.

897



899 **Tables**

900 Table 1 The control parameters of  $\varepsilon$ -MOMA and epsilon value of objectives

| Parameter                                  | Value           |
|--------------------------------------------|-----------------|
| Population size ( $N_{pop}$ )              | 200             |
| Maximum function evaluation ( $N_{eval}$ ) | $6 \times 10^4$ |
| Crossover probability ( $P_c$ )            | 0.90            |
| Mutation probability ( $P_m$ )             | 0.05            |
| $f_{TWS}$ epsilon ( $m^3/yr$ )             | $1 \times 10^4$ |
| $f_{TCOST}$ epsilon (CNY/yr)               | $1 \times 10^2$ |
| $f_{GSC}$ epsilon ( $m^3/yr$ )             | $1 \times 10^4$ |
| $f_{SRI}$ epsilon ( $m^3/yr$ )             | $1 \times 10^4$ |

901

902

903 Table 2 The objective values corresponding to several solutions

| Objective                                       | Solution 4 | Solution 5 | Solution 6 | Solution 7 |
|-------------------------------------------------|------------|------------|------------|------------|
| $f_{TWS} (\times 10^8 \text{ m}^3/\text{yr})$   | 10.7406    | 12.7355    | 8.6712     | 10.1032    |
| $f_{TCOST} (\times 10^6 \text{ CNY}/\text{yr})$ | 54.3013    | 92.1498    | 42.9522    | 82.7827    |
| $f_{GSC} (\times 10^8 \text{ m}^3/\text{yr})$   | -0.2471    | -1.2856    | 0.2192     | -0.4462    |
| $f_{SRI} (\times 10^8 \text{ m}^3/\text{yr})$   | 17.5698    | 17.0030    | 17.8180    | 17.1880    |

904

905

906

907

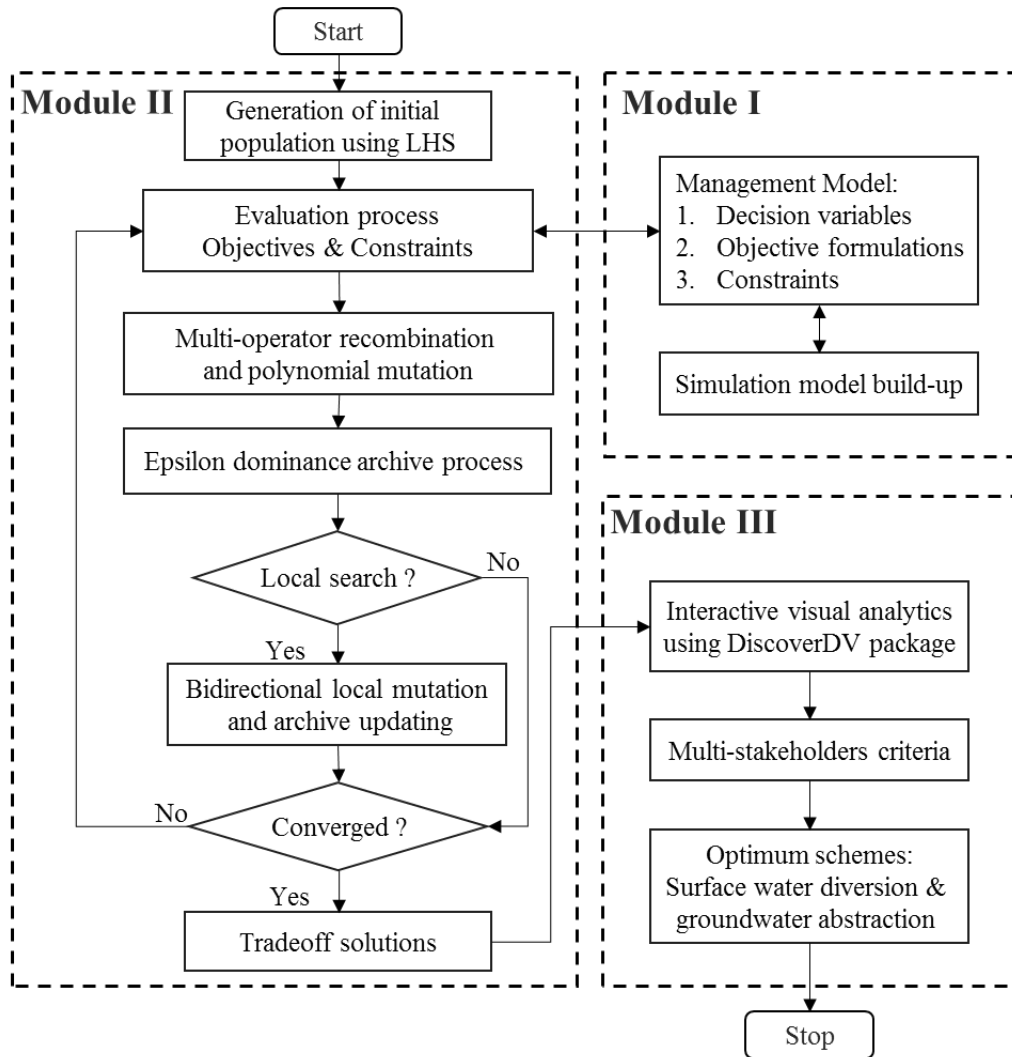

909  
 910 **Fig. 1.** Framework of multi-objective optimization for integrated SW-GW management.  
 911

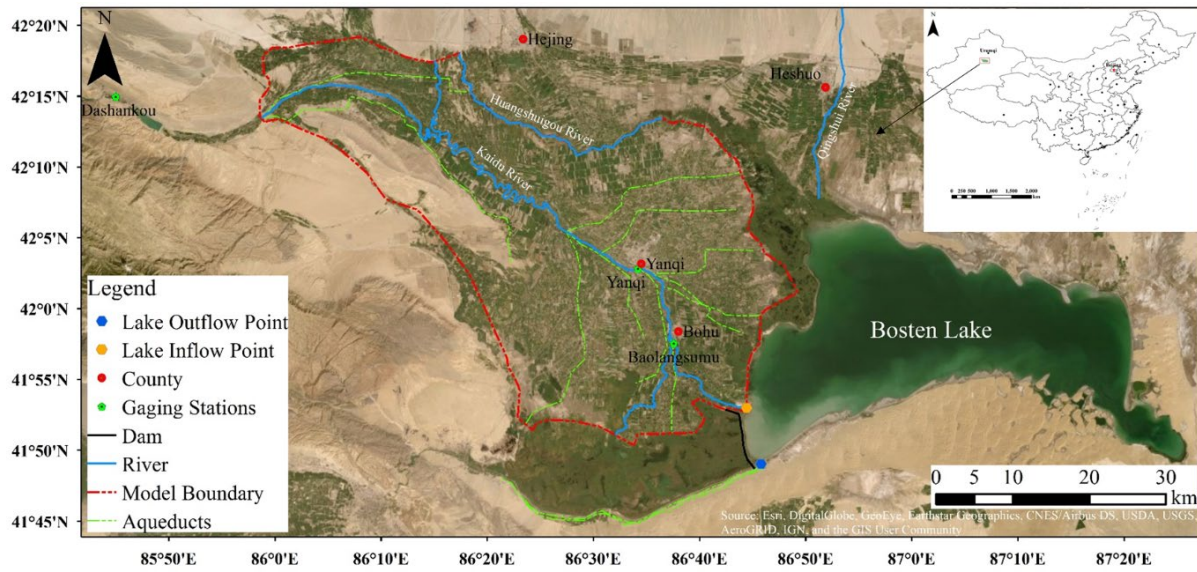

912

913 **Fig. 2.** The location of Yanqi Basin and the model domain of interest for this study. Source:

914 DigitalGlobal, Inc. (imagery).

915

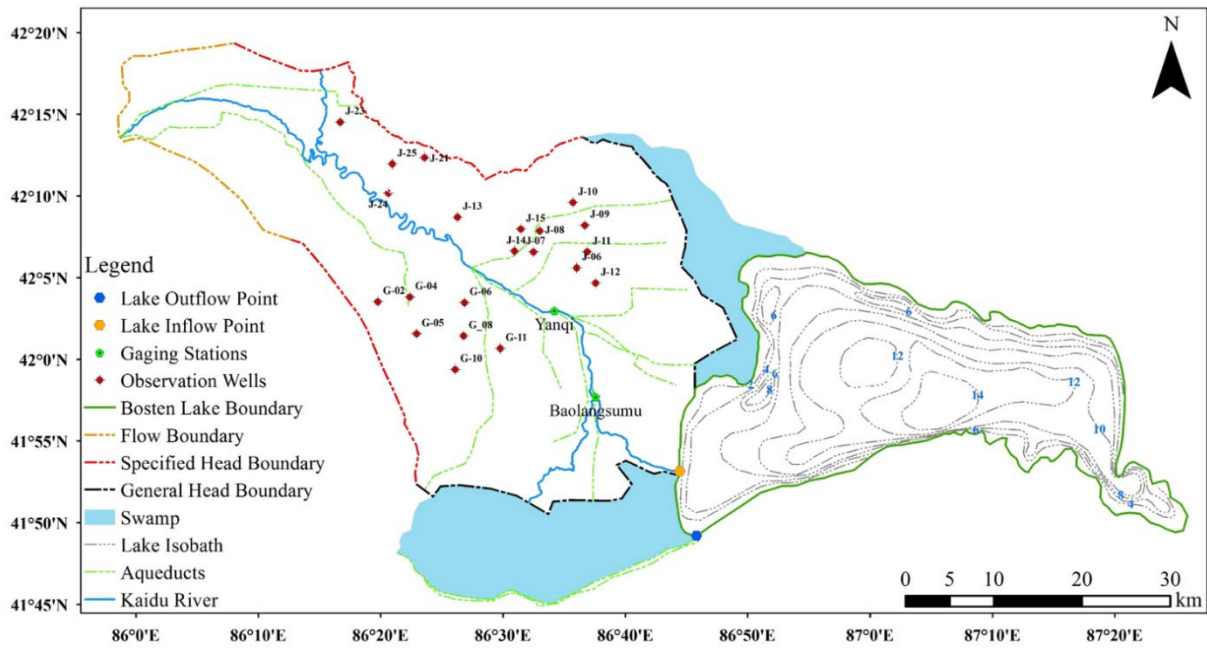

916  
 917 **Fig. 3.** The boundary conditions of model domain, monitoring locations of groundwater level  
 918 and surface runoff, aqueduct system and bathymetric contours in meters for Bosten  
 919 Lake.

920  
 921

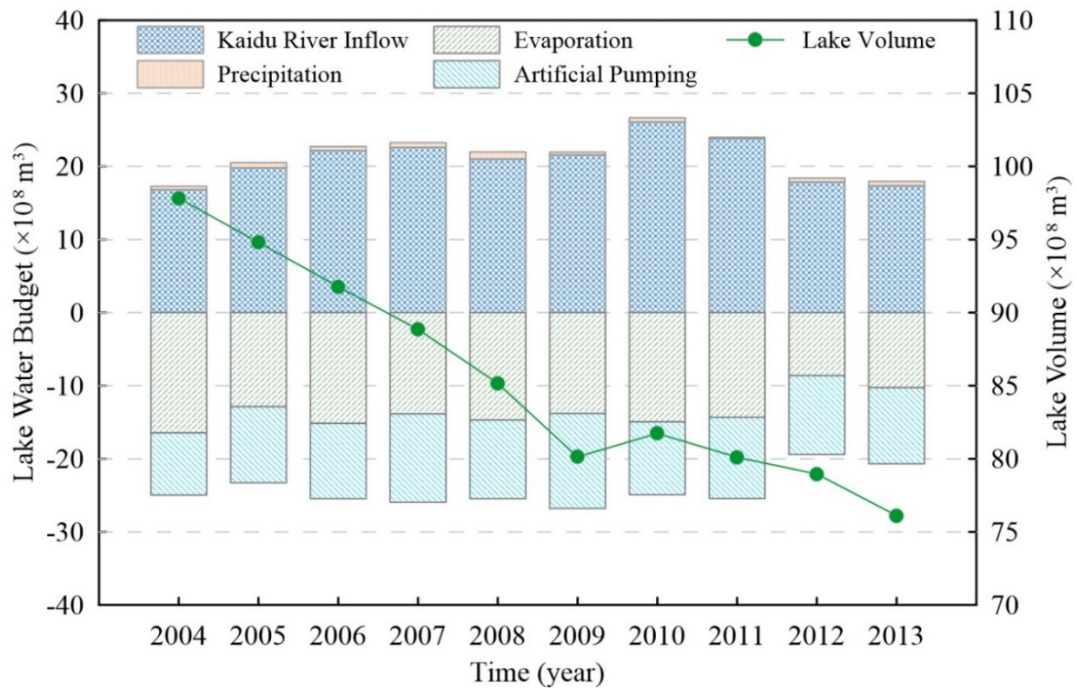

922  
 923 **Fig. 4.** The water balance terms of Bosten Lake and resulting lake volume in the simulation  
 924 period.  
 925

926



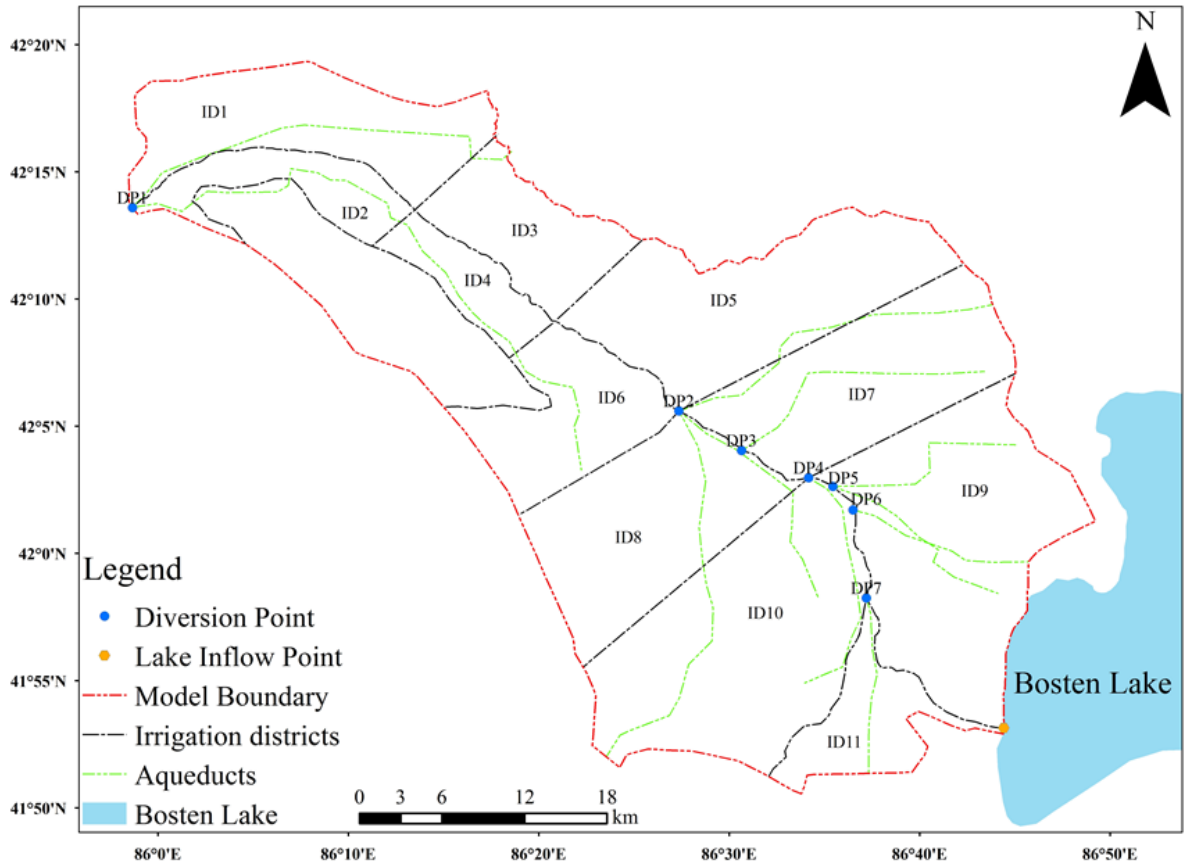

927

928 **Fig. 5.** The locations of surface water diversion points and subdomains of irrigation districts  
 929 for groundwater abstraction.

930

931

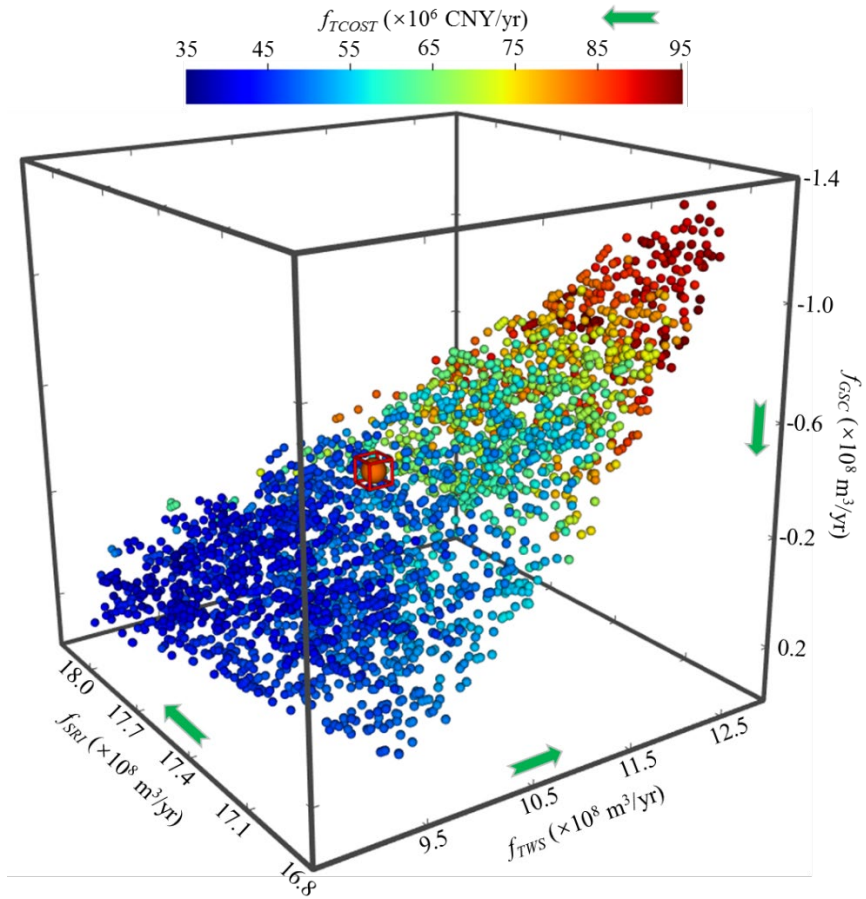

932  
 933 **Fig. 6.** The tradeoff surface to the integrated SW-GW management in Yanqi Basin. Each  
 934 spheric symbol represents a water use scheme corresponding to specific objective  
 935 values of the total water supply rate ( $f_{TWS}$ ), total cost of water delivery ( $f_{COST}$ ), surface  
 936 runoff inflow to lake ( $f_{SRI}$ ) and groundwater storage change ( $f_{GSC}$ ).  $f_{COST}$  is symbolized  
 937 in color to identify the objective value against others. The green arrow is the direction  
 938 of better performance for each objective. The scheme before optimization is marked in  
 939 a red square box.  
 940

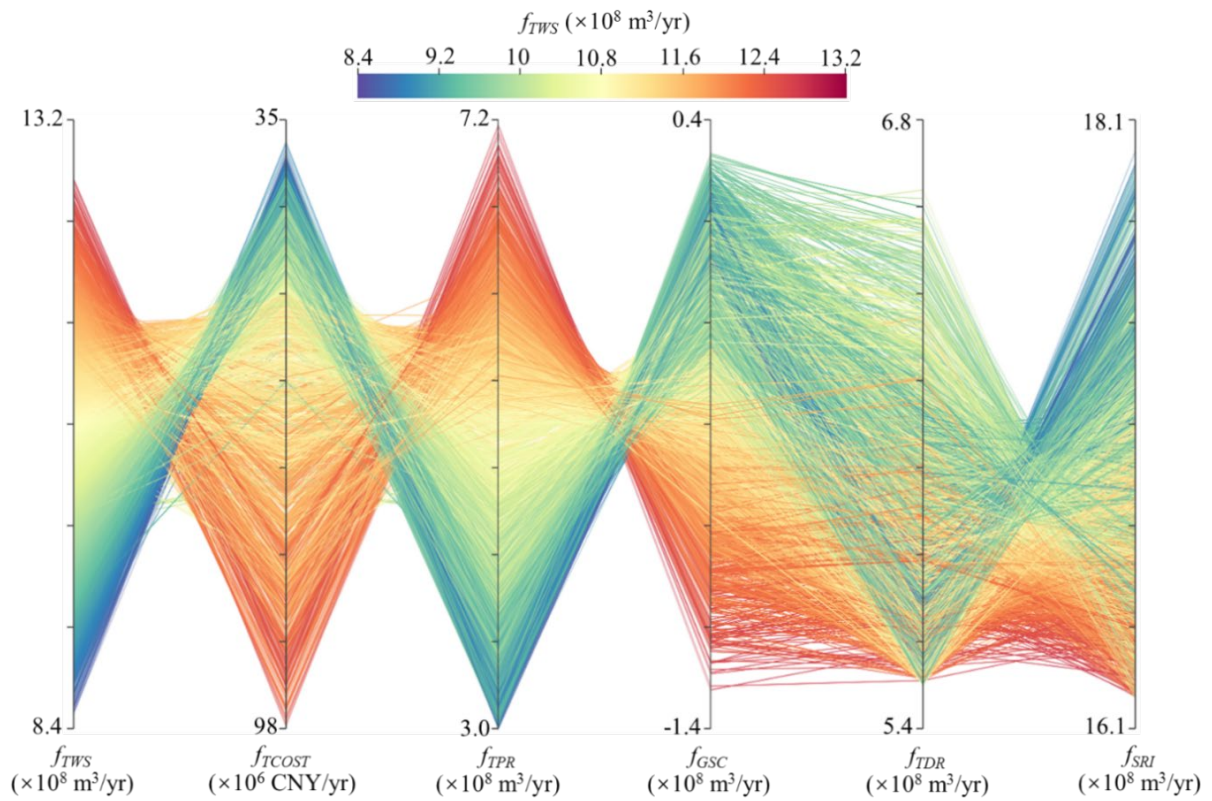

941

942 **Fig. 7.** The objective values ( $y$ -axis) are plotted over management objectives  $f_{TWS}$ ,  $f_{TCOST}$ ,  $f_{GSC}$ ,  
 943  $f_{SRI}$ , total pumping rate  $f_{TPR}$  and total surface water diversion rate  $f_{TDR}$  ( $x$ -axis),  $f_{TWS}$  is  
 944 represented in color. The preferred direction for each index is upward.

945

946

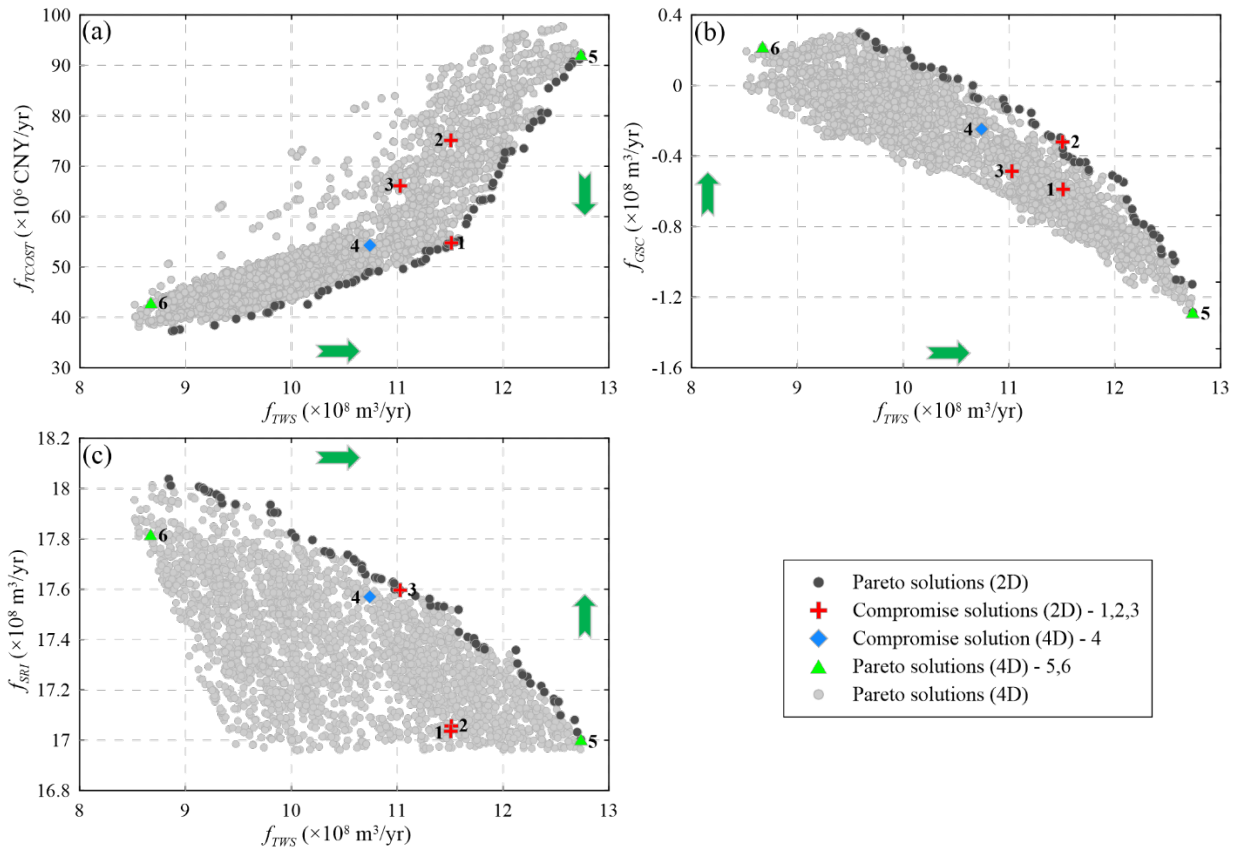

947  
 948 **Fig. 8.** Identification of six interesting solutions (Solutions 1-6) from the four-dimensional  
 949 approximate Pareto set and the green arrow is the preferred direction for each objective.  
 950

951

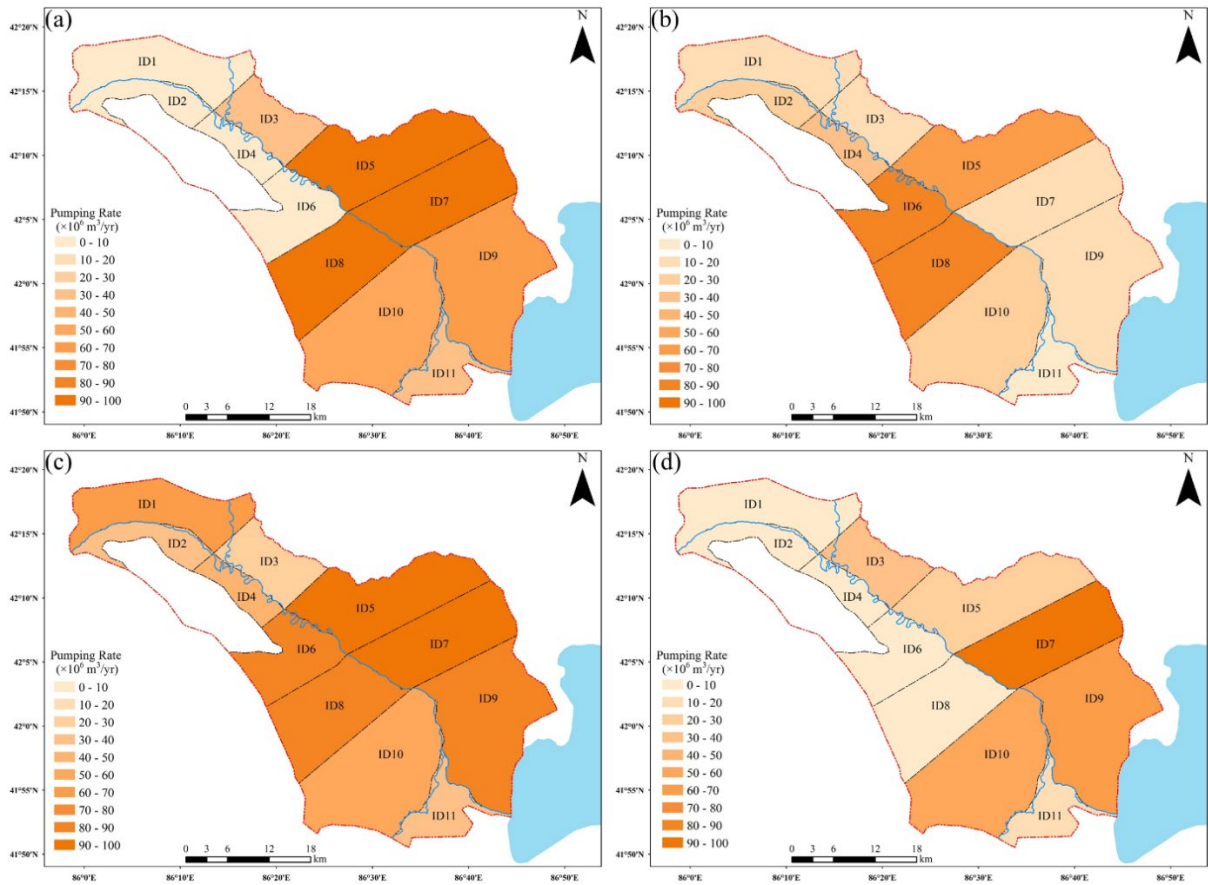

952  
 953 **Fig. 9.** The spatial distribution of the pumping rates in the 11 irrigation districts for the four  
 954 selected schemes of (a) Solution 4, (b) Solution 7, (c) Solution 5, and (d) Solution 6,  
 955 respectively.

956

957

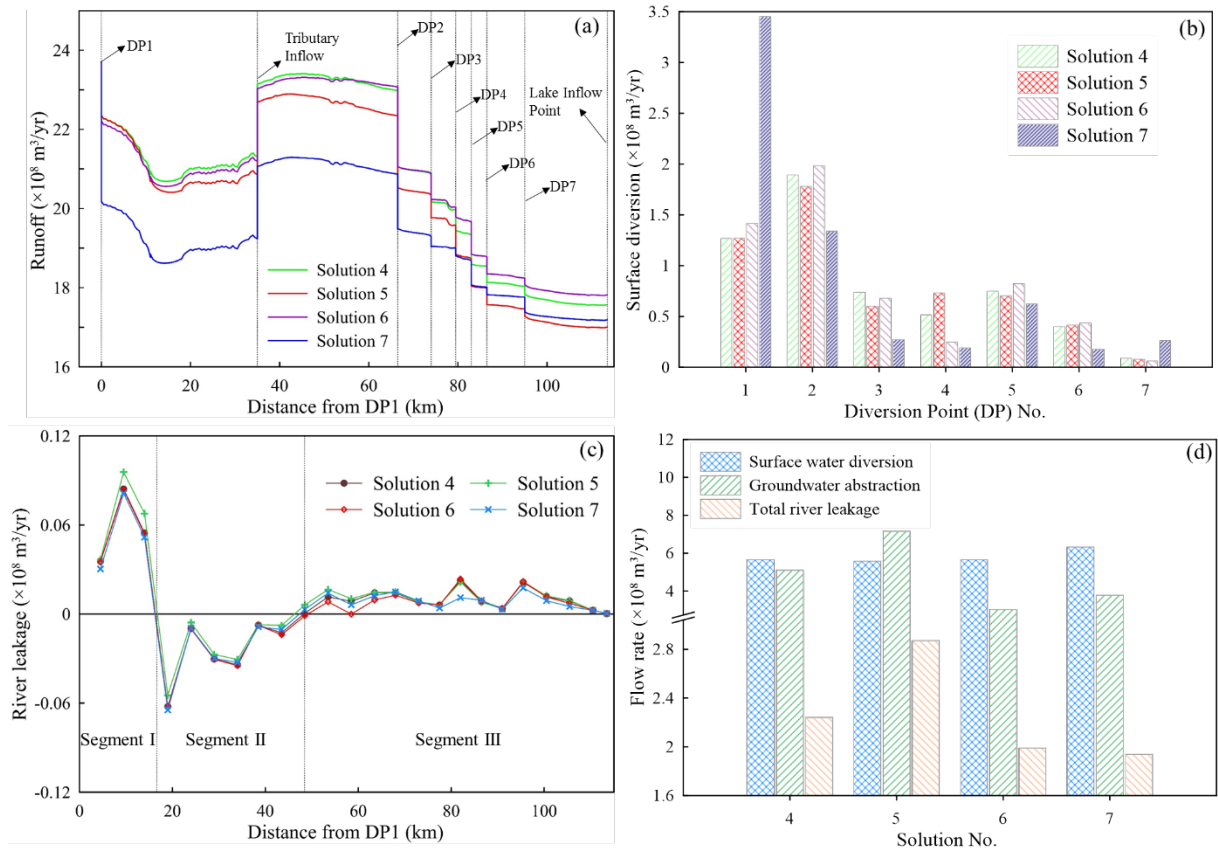

958  
 959 **Fig. 10.** Variation of surface runoff and river leakage along the stem stream of Kaidu River: (a)  
 960 the profile of river runoff; (b) the distribution of surface water diversion at the different  
 961 diversion points; (c) the profile of river leakage; (d) the components of total river  
 962 leakage, groundwater abstraction and surface water diversion for several typical  
 963 Solutions 4-7.

964  
 965

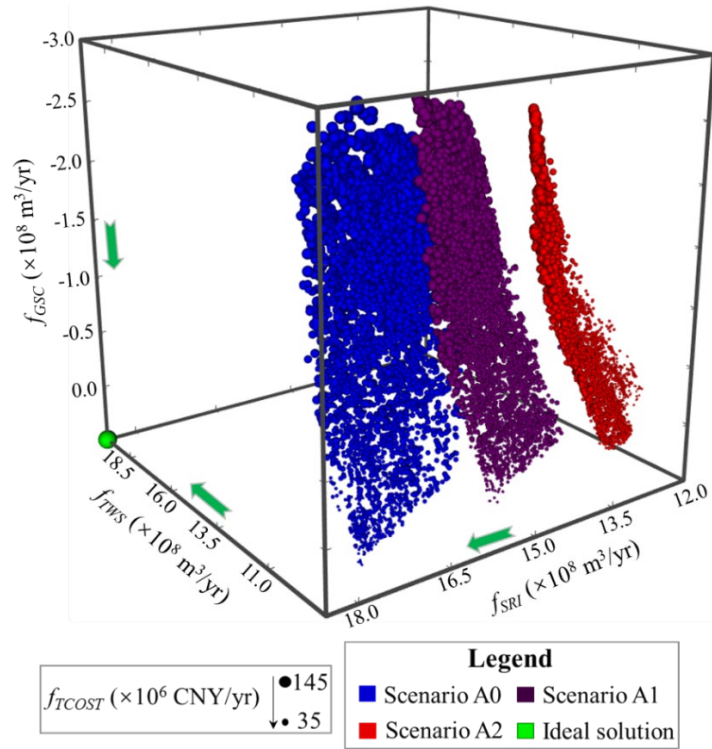

966

967 **Fig. 11.** The tradeoff solutions under Scenarios A0 (maintain current runoff), A1 (reduce the

968 runoff by 10%) and A2 (reduce the runoff by 20%), and the sphere size indicates the

969 value of  $f_{Tcost}$ . The green arrow is the direction of better performance for each

970 objective.

971

972

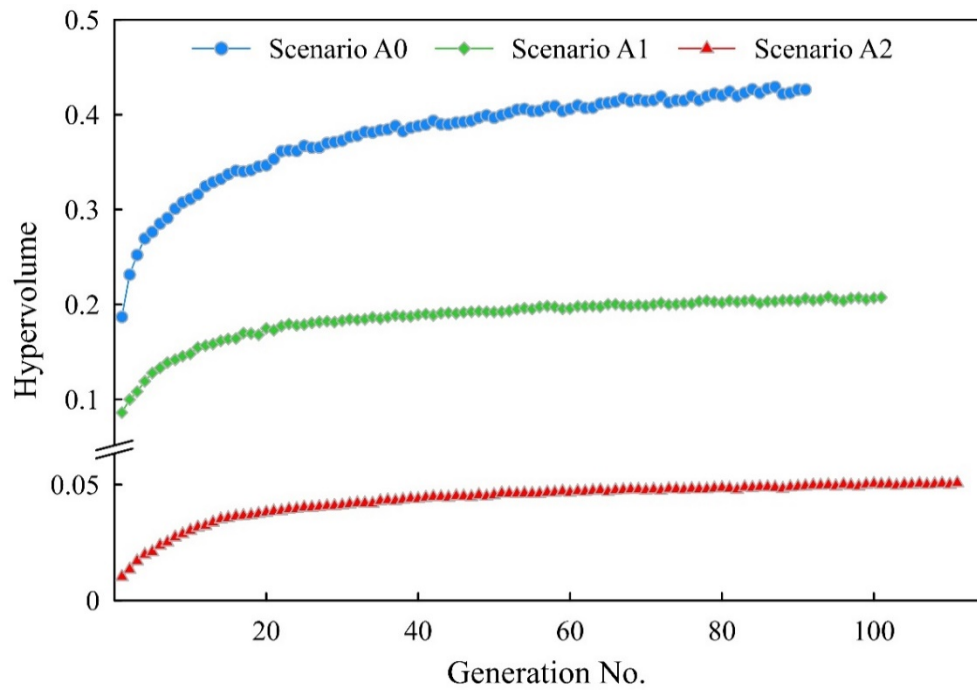

973  
 974 **Fig. 12.** Evolution of the hypervolume metric over the generation number for Scenarios A0, A1  
 975 and A2.  
 976



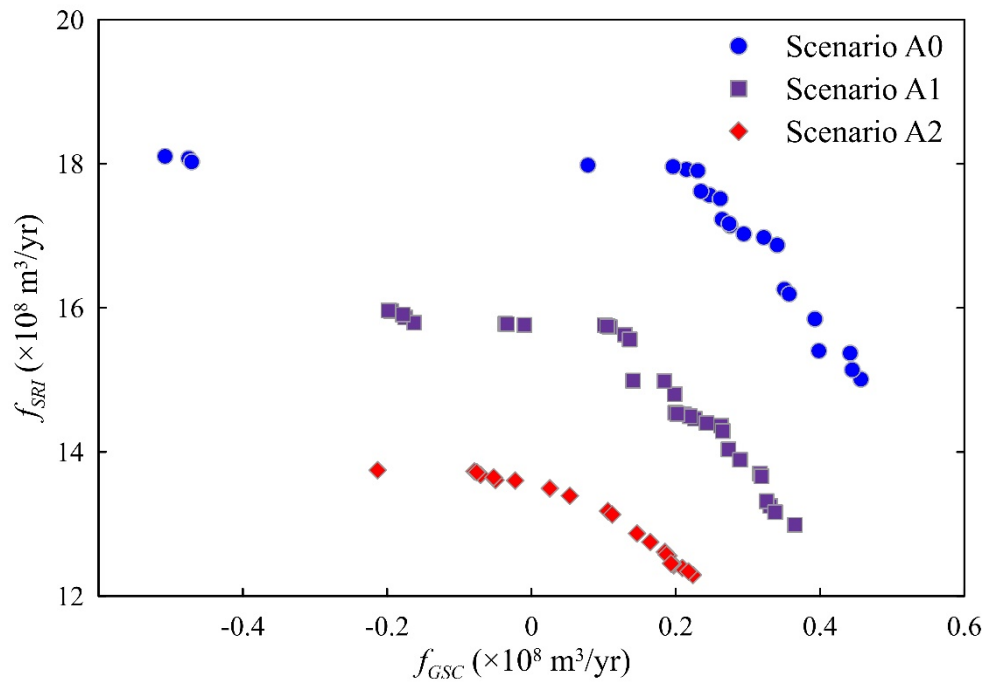

977

978 **Fig. 13.** Non-dominated fronts of Scenarios A0, A1 and A2 between objectives of  $f_{GSC}$  vs.  $f_{SRI}$ .

979

980

1 *Supplementary Materials for*

2 **Basin-scale multi-objective simulation-optimization modeling for**  
3 **conjunctive use of surface water and groundwater in northwest China**

4

5 Jian Song<sup>a</sup>, Yun Yang<sup>b</sup>, Xiaomin Sun<sup>c</sup>, Jin Lin<sup>c</sup>, Ming Wu<sup>d</sup>, Jianfeng Wu<sup>a,\*</sup>, Jichun Wu<sup>a</sup>

6

7 <sup>a</sup> Key Laboratory of Surficial Geochemistry, Ministry of Education; Department of  
8 Hydrosiences, School of Earth Sciences and Engineering, Nanjing University, Nanjing,  
9 210023, China

10 <sup>b</sup> School of Earth Sciences and Engineering, Hohai University, Nanjing, 210098, China

11 <sup>c</sup> Nanjing Hydraulic Research Institute, National Key Laboratory of Water Resources and  
12 Hydraulic Engineering, Nanjing, 210029, China

13 <sup>d</sup> Institute of Groundwater and Earth Sciences, Jinan University, Guangzhou, 510632, China

14

15 \*Correspondence to: Jianfeng Wu ([jfwu@nju.edu.cn](mailto:jfwu@nju.edu.cn); [jfwu.nju@gmail.com](mailto:jfwu.nju@gmail.com))

16

17 **Table S1** The control parameters and hypervolume metric obtained for  $\varepsilon$ -MOMA on  
 18  $M$ -objective DTLZ1 and DTLZ3 problems

| Problem | $M$ | $N_{dv}$ | $N_{pop}$ | $N_{eval}$ | $\varepsilon_{obj}$ | $rp$ | $HV_{rs}$ | $HV_{as}$ | $HV_n$ |
|---------|-----|----------|-----------|------------|---------------------|------|-----------|-----------|--------|
| DTLZ1   | 3   | $M+9$    | 200       | 100,000    | 0.01                | 0.55 | 0.14575   | 0.14480   | 0.9935 |
|         | 4   |          |           | 150,000    |                     |      | 0.08883   | 0.08828   | 0.9939 |
|         | 5   |          |           | 200,000    |                     |      | 0.05000   | 0.04982   | 0.9964 |
|         | 6   |          |           | 400,000    |                     |      | 0.02763   | 0.02759   | 0.9985 |
| DTLZ3   | 3   | $M+9$    | 200       | 100,000    | 0.01                | 1.05 | 0.63507   | 0.61857   | 0.9740 |
|         | 4   |          |           | 150,000    |                     |      | 0.89568   | 0.85577   | 0.9554 |
|         | 5   |          |           | 200,000    |                     |      | 1.08860   | 1.03550   | 0.9512 |
|         | 6   |          |           | 400,000    |                     |      | 1.23140   | 1.19210   | 0.9681 |

19 Note:  $M$  = number of objectives;  $N_{dv}$  = number of decision variables;  $N_{pop}$  = population size;  
 20  $N_{eval}$  = number of function evaluations;  $\varepsilon_{obj}$  = epsilon value for each objective;  $rp$  = the value of  
 21 reference point for each objective;  $HV_{rs}$  = hypervolume of Pareto reference set;  $HV_{as}$  =  
 22 hypervolume of Pareto approximate set;  $HV_n$  = the normalized hypervolume.

23

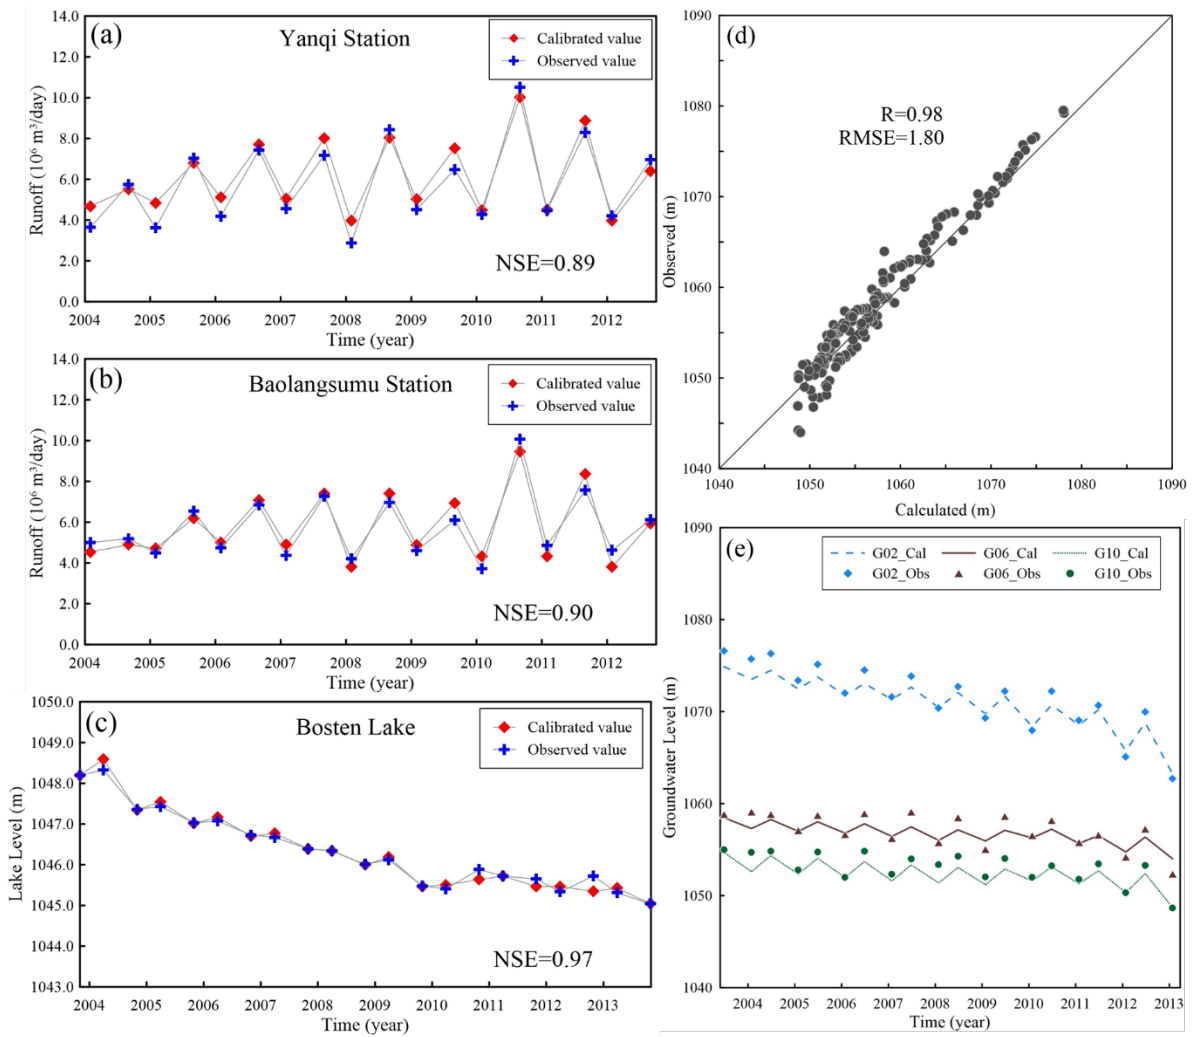

24  
 25 **Fig. S1** The calibrated results of the transient model showing (a) observed vs. calibrated runoff  
 26 at Yanqi station over time, (b) observed vs. calibrated runoff at Baolangsumu station over time;  
 27 (c) observed vs. calibrated lake level over time; (d) comparison of observed and calibrated  
 28 groundwater heads at all observation wells, and (e) observed vs. calibrated groundwater heads  
 29 over time at three typical observation locations as labeled in Fig. 3.

30
