# Supplementary material for: Basin-scale multi-objective simulation-optimization modeling for conjunctive use of surface water and groundwater in northwest China
Source: Copernicus journal article supplement (doi:10.5194/hess-2019-278), 2019-07-02
Supplement: Supplementary file [file hess-2019-278-AC3-supplement.zip]

1 *Supplementary Materials for*

2 **Basin-scale multi-objective simulation-optimization modeling for**  
3 **conjunctive use of surface water and groundwater in northwest China**

4  
5 Jian Song<sup>a</sup>, Yun Yang<sup>b</sup>, Xiaomin Sun<sup>c</sup>, Jin Lin<sup>c</sup>, Ming Wu<sup>d</sup>, Jianfeng Wu<sup>a,\*</sup>, Jichun Wu<sup>a</sup>

6  
7 <sup>a</sup> Key Laboratory of Surficial Geochemistry, Ministry of Education; Department of  
8 Hydrosiences, School of Earth Sciences and Engineering, Nanjing University, Nanjing,  
9 210023, China

10 <sup>b</sup> School of Earth Sciences and Engineering, Hohai University, Nanjing, 210098, China

11 <sup>c</sup> Nanjing Hydraulic Research Institute, National Key Laboratory of Water Resources and  
12 Hydraulic Engineering, Nanjing, 210029, China

13 <sup>d</sup> Institute of Groundwater and Earth Sciences, Jinan University, Guangzhou, 510632, China

14  
15 *\*Correspondence to:* Jianfeng Wu ([jfwu@nju.edu.cn](mailto:jfwu@nju.edu.cn); [jfwu.nju@gmail.com](mailto:jfwu.nju@gmail.com))

**Table S1** The control parameters and hypervolume metric obtained for  $\varepsilon$ -MOMA on  $M$ -objective DTLZ1 and DTLZ3 problems

| Problem | $M$ | $N_{dv}$ | $N_{pop}$ | $N_{eval}$ | $\varepsilon_{obj}$ | $rp$ | $HV_{rs}$ | $HV_{as}$ | $HV_n$ |
|---------|-----|----------|-----------|------------|---------------------|------|-----------|-----------|--------|
| DTLZ1   | 3   | $M+9$    | 200       | 100,000    | 0.01                | 0.55 | 0.14575   | 0.14480   | 0.9935 |
|         | 4   |          |           | 150,000    |                     |      | 0.08883   | 0.08828   | 0.9939 |
|         | 5   |          |           | 200,000    |                     |      | 0.05000   | 0.04982   | 0.9964 |
|         | 6   |          |           | 400,000    |                     |      | 0.02763   | 0.02759   | 0.9985 |
| DTLZ3   | 3   | $M+9$    | 200       | 100,000    | 0.01                | 1.05 | 0.63507   | 0.61857   | 0.9740 |
|         | 4   |          |           | 150,000    |                     |      | 0.89568   | 0.85577   | 0.9554 |
|         | 5   |          |           | 200,000    |                     |      | 1.08860   | 1.03550   | 0.9512 |
|         | 6   |          |           | 400,000    |                     |      | 1.23140   | 1.19210   | 0.9681 |

Note:  $M$  = number of objectives;  $N_{dv}$  = number of decision variables;  $N_{pop}$  = population size;  $N_{eval}$  = number of function evaluations;  $\varepsilon_{obj}$  = epsilon value for each objective;  $rp$  = the value of reference point for each objective;  $HV_{rs}$  = hypervolume of Pareto reference set;  $HV_{as}$  = hypervolume of Pareto approximate set;  $HV_n$  = the normalized hypervolume.

25 **Table S2** Multisource data for the model build-up

| Category                                | Data                        | Data Time                                         | Spatial Resolution                          |
|-----------------------------------------|-----------------------------|---------------------------------------------------|---------------------------------------------|
| Initial parameterization and resolution | DEM                         | 2008                                              | 90×90 m                                     |
|                                         | River network               | 2009                                              | (Google Map)                                |
|                                         | Aqueducts                   | 2009                                              | (Reports)                                   |
|                                         | Hydrogeology Map            | 1977                                              | 1:200000                                    |
|                                         | Lake topography             | 1977                                              | 1:200000                                    |
|                                         | Bottom of aquifer           | 1977                                              | 1:200000                                    |
| Dynamic data and resolution             | Boundary river inflow       | 2003-2012 (monthly)                               | 1 station                                   |
|                                         | Boundary groundwater inflow | 2009 (yearly)                                     | (Reports)                                   |
|                                         | Boundary groundwater level  | 2003-2013 (non-irrigation and irrigation periods) | 5 monitoring wells                          |
|                                         | Meteorological observations | 2003-2013 (monthly)                               | 3 stations                                  |
|                                         | Surface water diversion     | 2003-2013 (non-irrigation and irrigation periods) | 11 aqueducts                                |
|                                         | Groundwater pumping         | 2003-2013 (yearly)                                | 11 irrigation districts                     |
|                                         | Lake artificial pumping     | 2003-2013 (monthly)                               | 1 station                                   |
| Calibrated data and resolution          | Streamflow                  | 2003-2012 (monthly)                               | 2 stations                                  |
|                                         | Groundwater level           | 2003-2013 (non-irrigation and irrigation periods) | 7 wells (2003-2013)<br>14 wells (2012-2013) |
|                                         | Lake level                  | 2003-2013 (monthly)                               | 1 station                                   |

26

27

28

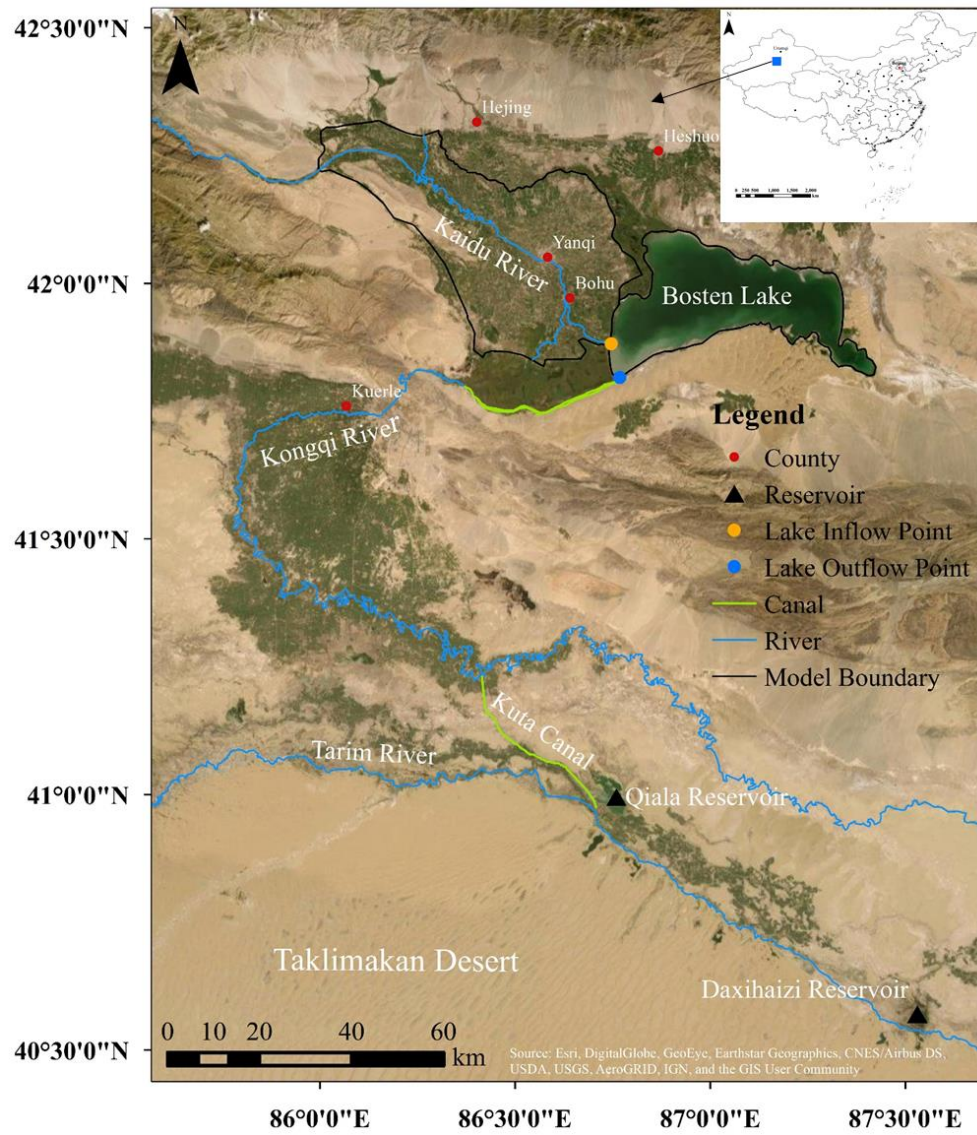

**Fig. S1** The Ecological Water Conveyance Project

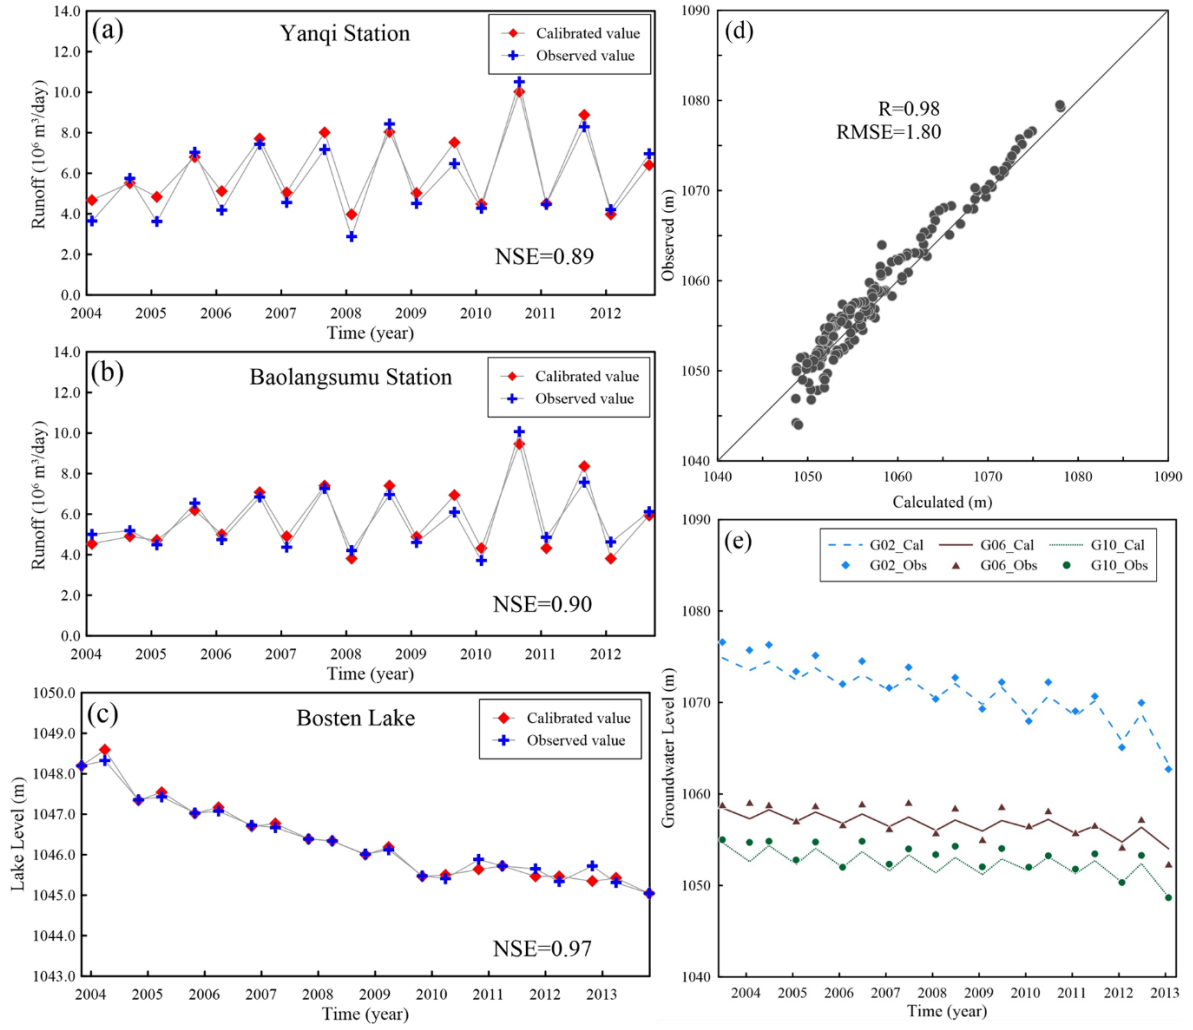

**Fig. S2** The calibrated results of the transient model showing (a) observed vs. calibrated runoff at Yanqi station over time, (b) observed vs. calibrated runoff at Baolangsumu station over time; (c) observed vs. calibrated lake level over time; (d) comparison of observed and calibrated groundwater heads at all observation wells, and (e) observed vs. calibrated groundwater heads over time at three typical observation locations as labeled in Fig. 3.
